# Supplementary material for: Ternary copper(ii)-polypyridyl enantiomers: aldol-type condensation, characterization, DNA-binding recognition, BSA-binding and anticancer property
Source: Royal Society of Chemistry journal article supplement (doi:10.1039/c3dt50884f), 2013-01-01
Supplement: c3dt50884f.pdf [file c3dt50884f.pdf]

## Supplementary Information

### Appendix I

#### (A) ESI-MS spectra (Figs. S1.1-S1.4)

Figure S1.1 ESI-MS spectrum of [Cu(phen)(L-Threo)(H<sub>2</sub>O)]NO<sub>3</sub> 1

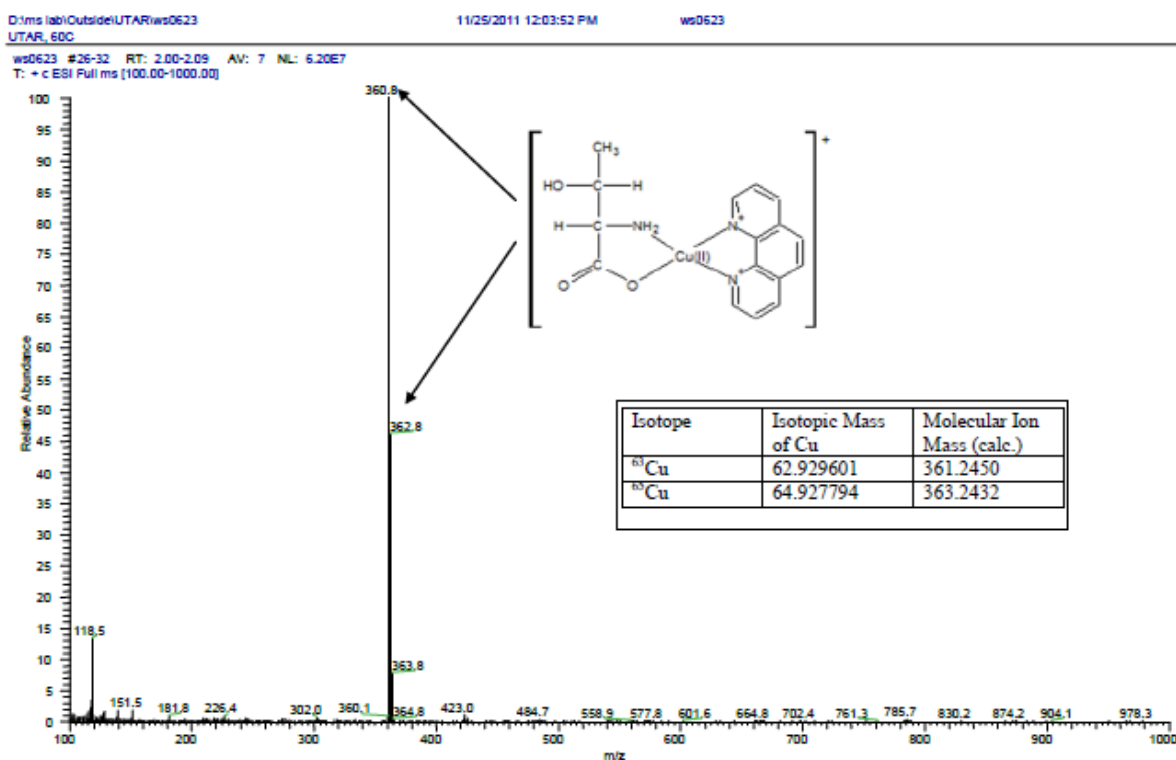

Figure S1.2 ESI-MS spectrum of [Cu(phen)(D-Threo)(H<sub>2</sub>O)]NO<sub>3</sub> 2

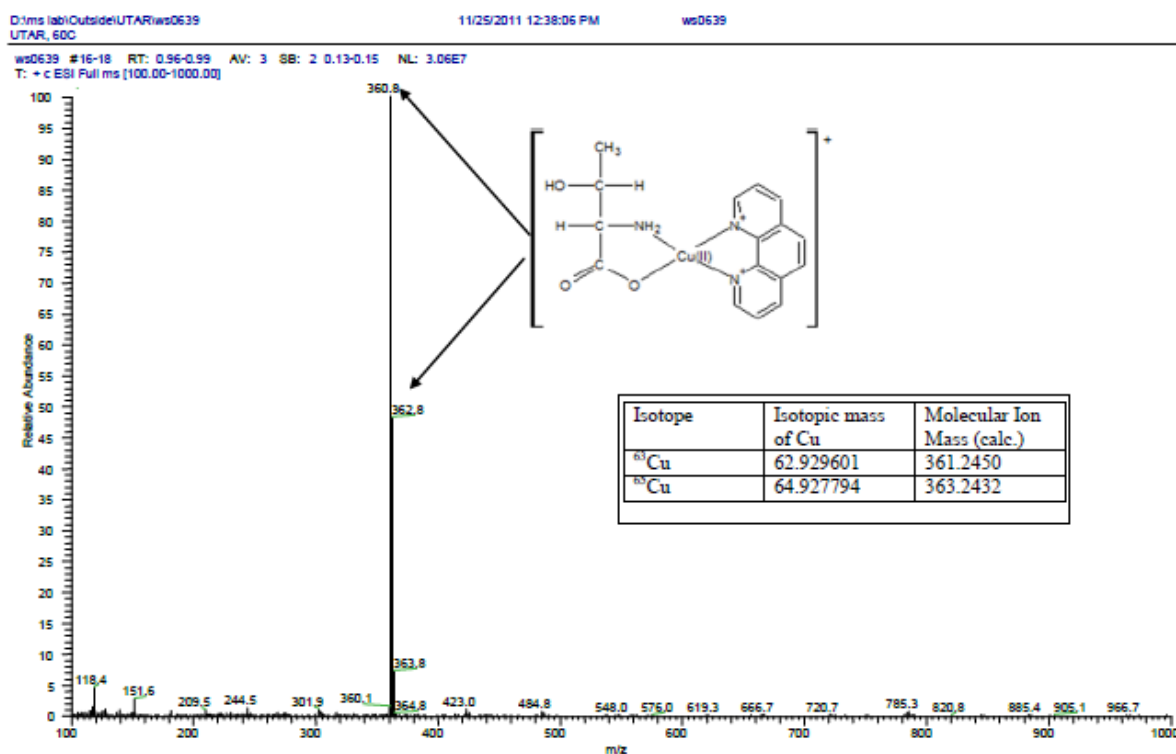

Figure S1.3 ESI-MS spectrum of L-[Cu(phen)(5MeOCA)(H<sub>2</sub>O)]NO<sub>3</sub> 3

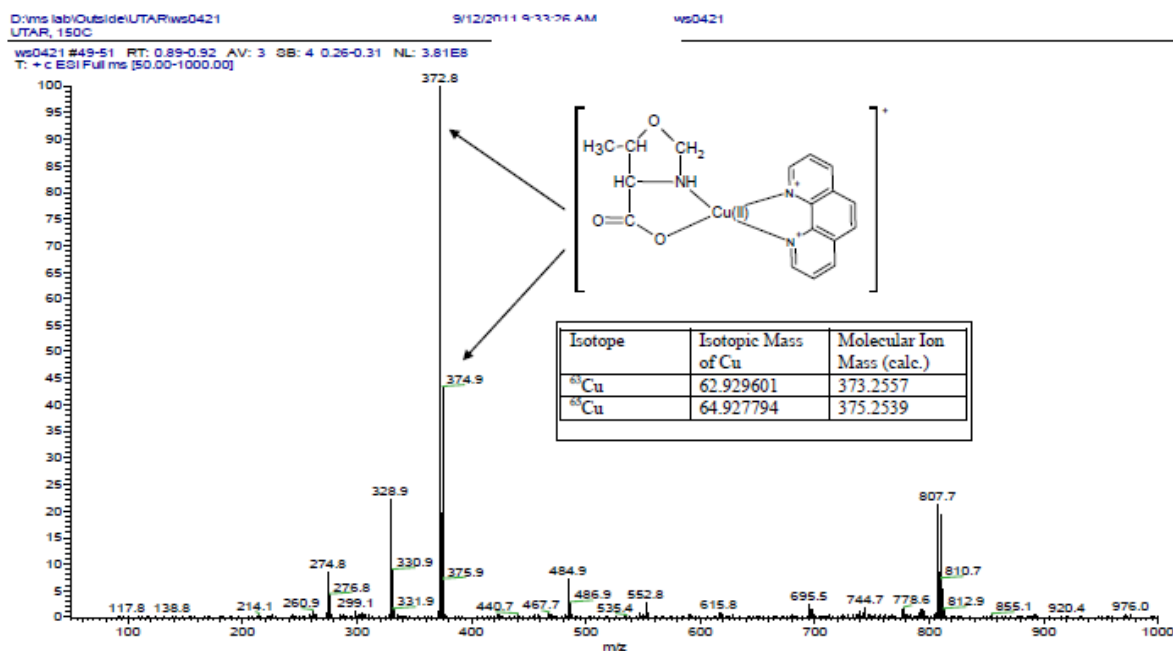

Figure 1.4 ESI-MS spectrum of D-[Cu(phen)(5MeOCA)(H<sub>2</sub>O)]NO<sub>3</sub> 4

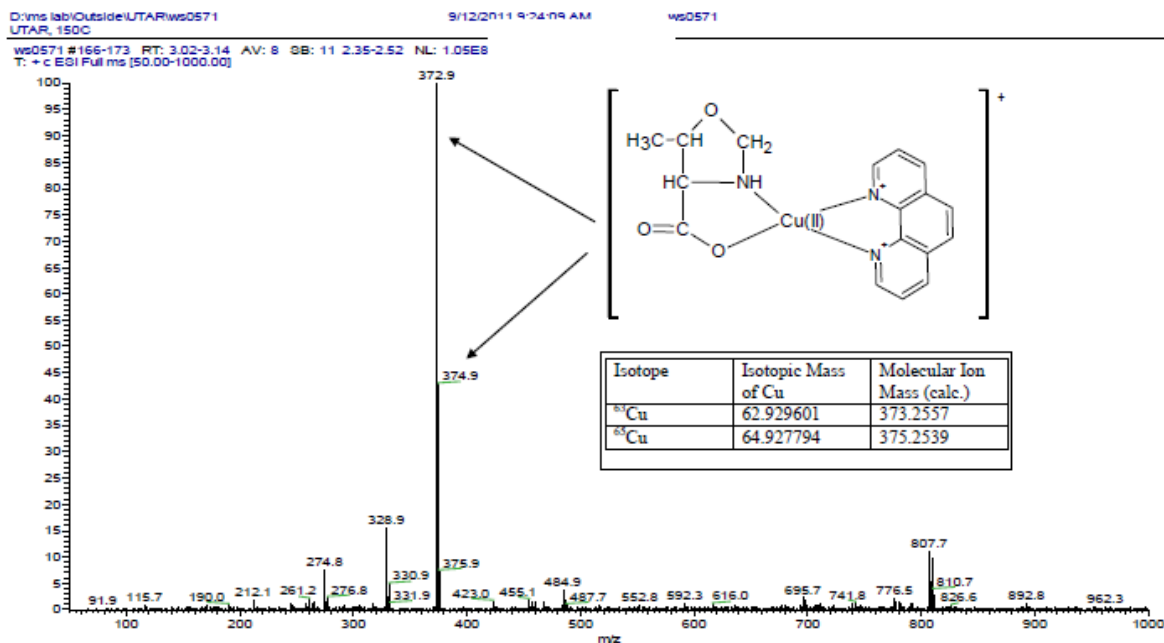

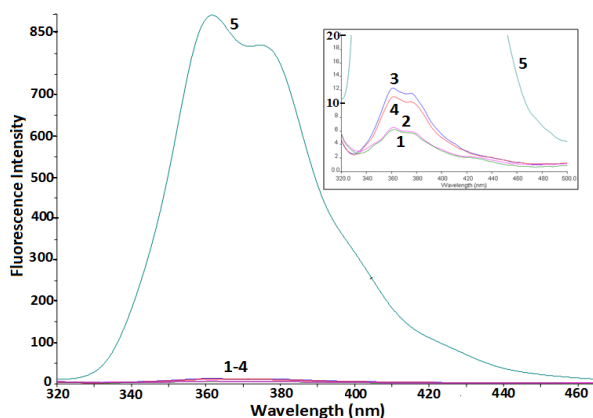

Supplementary Fig. S2 Fluorescence spectra of  $1 \times 10^{-5}$  M **1** – **5** in water-methanol (1:1 v/v). Insert shows clearly the FL spectra of **1** – **4**.

(B) Restriction Enzyme inhibition by  $\text{CuCl}_2$ ,  $[\text{Cu}(\text{phen})\text{Cl}_2]$ , and copper(II) complexes **1-4** (Figs. S3.1-S3.6)

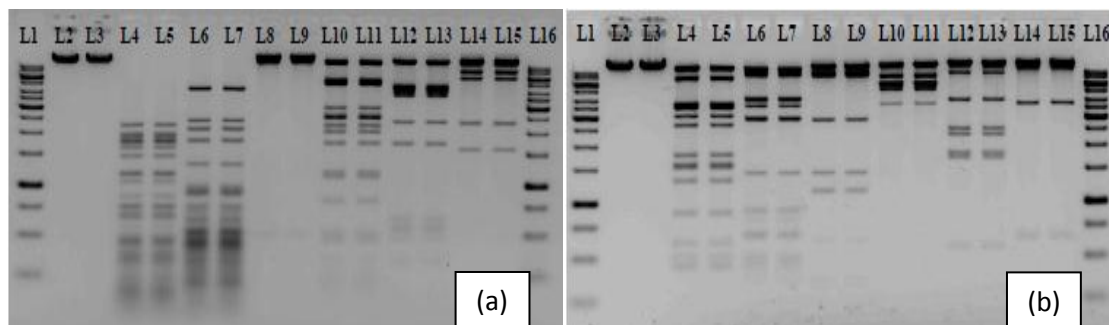

Figure S3.1 RE inhibition by  $\text{CuCl}_2$ . Electrophoresis results of incubating  $\lambda$  DNA ( $0.5 \mu\text{g}/\mu\text{L}$ ) with 5 unit of restriction enzyme in the presence or absence of  $50 \mu\text{M}$   $\text{CuCl}_2$  for 2 hours at  $37^\circ\text{C}$ .

(a) Lane 1, 1kb DNA ladder; Lane 2,  $\lambda$  DNA alone ( $0.5 \mu\text{g}$ ); Lane 3,  $\lambda$  DNA +  $50 \mu\text{M}$   $\text{CuCl}_2$ ; Lane 4,  $\lambda$  DNA + 5 unit Tsp 509I (control); Lane 5,  $\lambda$  DNA + 5 unit Tsp 509I +  $50 \mu\text{M}$   $\text{CuCl}_2$ ; Lane 6,  $\lambda$  DNA + 5 unit Hae III (control); Lane 7,  $\lambda$  DNA + 5 unit Hae III +  $50 \mu\text{M}$   $\text{CuCl}_2$ ; Lane 8,  $\lambda$  DNA + 5 unit Sal I (control); Lane 9,  $\lambda$  DNA + 5 unit Sal I +  $50 \mu\text{M}$   $\text{CuCl}_2$ ; Lane 10,  $\lambda$  DNA + 5 unit Pst I (control); Lane 11,  $\lambda$  DNA + 5 unit Pst I +  $50 \mu\text{M}$   $\text{CuCl}_2$ ; Lane 12,  $\lambda$  DNA + 5 unit Pvu II (control); Lane 13,  $\lambda$  DNA + 5 unit Pvu II +  $50 \mu\text{M}$   $\text{CuCl}_2$ ; Lane 14,  $\lambda$  DNA + 5 unit Sca I (control); Lane 15,  $\lambda$  DNA + 5 unit Sca I +  $50 \mu\text{M}$   $\text{CuCl}_2$ ; Lane 16, 1kb DNA ladder.

(b) Lane 1, 1kb DNA ladder; Lane 2,  $\lambda$  DNA alone ( $0.5 \mu\text{g}$ ); Lane 3,  $\lambda$  DNA +  $50 \mu\text{M}$   $\text{CuCl}_2$ ; Lane 4,  $\lambda$  DNA + 5 unit Ssp I (control); Lane 5,  $\lambda$  DNA + 5 unit Ssp I +  $50 \mu\text{M}$   $\text{CuCl}_2$ ; Lane 6,  $\lambda$  DNA + 5 unit Ase I (control); Lane 7,  $\lambda$  DNA + 5 unit Ase I +  $50 \mu\text{M}$   $\text{CuCl}_2$ ; Lane 8,  $\lambda$  DNA + 5 unit Mun I (control); Lane 9,  $\lambda$  DNA + 5 unit Mun I +  $50 \mu\text{M}$   $\text{CuCl}_2$ ; Lane 10,  $\lambda$  DNA + 5 unit EcoR I (control); Lane 11,  $\lambda$  DNA + 5 unit EcoR I +  $50 \mu\text{M}$  metal salt; Lane 12,  $\lambda$  DNA + 5 unit NdeI (control); Lane 13,  $\lambda$  DNA + 5 unit NdeI +  $50 \mu\text{M}$   $\text{CuCl}_2$ ; Lane 14,  $\lambda$  DNA + 5 unit Bst 11071 (control); Lane 15,  $\lambda$  DNA + 5 unit Bst 11071 +  $50 \mu\text{M}$   $\text{CuCl}_2$ ; Lane 16, 1kb DNA ladder.

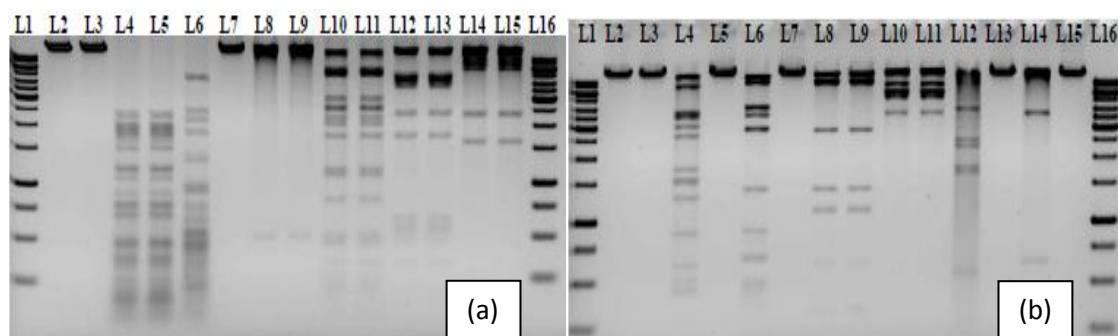

Figure S3.2 RE inhibition by  $[\text{Cu}(\text{phen})\text{Cl}_2]$ . Electrophoresis results of incubating  $\lambda$  DNA ( $0.5 \mu\text{g}/\mu\text{L}$ ) with 5 unit of restriction enzyme in the presence or absence of  $50 \mu\text{M}$   $[\text{Cu}(\text{phen})\text{Cl}_2]$  for 2 hours at  $37^\circ\text{C}$ .

(a) Lane 1, 1kb DNA ladder; Lane 2,  $\lambda$  DNA alone ( $0.5 \mu\text{g}$ ); Lane 3,  $\lambda$  DNA +  $50 \mu\text{M}$   $[\text{Cu}(\text{phen})\text{Cl}_2]$ ; Lane 4,  $\lambda$  DNA + 5 unit Tsp 509I (control); Lane 5,  $\lambda$  DNA + 5 unit Tsp 509I +  $50 \mu\text{M}$   $[\text{Cu}(\text{phen})\text{Cl}_2]$ ; Lane 6,  $\lambda$  DNA + 5 unit Hae III (control); Lane 7,  $\lambda$  DNA + 5 unit Hae III +  $50 \mu\text{M}$   $[\text{Cu}(\text{phen})\text{Cl}_2]$ ; Lane 8,  $\lambda$  DNA + 5 unit Sal I (control); Lane 9,  $\lambda$  DNA + 5 unit Sal I +  $50 \mu\text{M}$   $[\text{Cu}(\text{phen})\text{Cl}_2]$ ; Lane 10,  $\lambda$  DNA + 5 unit Pst I (control); Lane 11,  $\lambda$  DNA + 5 unit Pst I +  $50 \mu\text{M}$   $[\text{Cu}(\text{phen})\text{Cl}_2]$ ; Lane 12,  $\lambda$  DNA + 5 unit Pvu II (control); Lane 13,  $\lambda$  DNA + 5 unit Pvu II +  $50 \mu\text{M}$   $[\text{Cu}(\text{phen})\text{Cl}_2]$ ; Lane 14,  $\lambda$  DNA + 5 unit Sca I (control); Lane 15,  $\lambda$  DNA + 5 unit Sca I +  $50 \mu\text{M}$   $[\text{Cu}(\text{phen})\text{Cl}_2]$ ; Lane 16, 1kb DNA ladder.

(b) Lane 1, 1kb DNA ladder; Lane 2,  $\lambda$  DNA alone ( $0.5 \mu\text{g}$ ); Lane 3,  $\lambda$  DNA +  $50 \mu\text{M}$   $[\text{Cu}(\text{phen})\text{Cl}_2]$ ; Lane 4,  $\lambda$  DNA + 5 unit Ssp I (control); Lane 5,  $\lambda$  DNA + 5 unit Ssp I +  $50 \mu\text{M}$   $[\text{Cu}(\text{phen})\text{Cl}_2]$ ; Lane 6,  $\lambda$  DNA + 5 unit Ase I (control); Lane 7,  $\lambda$  DNA + 5 unit Ase I +  $50 \mu\text{M}$   $[\text{Cu}(\text{phen})\text{Cl}_2]$ ; Lane 8,  $\lambda$  DNA + 5 unit Mun I (control); Lane 9,  $\lambda$  DNA + 5 unit Mun I +  $50 \mu\text{M}$   $[\text{Cu}(\text{phen})\text{Cl}_2]$ ; Lane 10,  $\lambda$  DNA + 5 unit EcoR I (control); Lane 11,  $\lambda$  DNA + 5 unit EcoR I +  $50 \mu\text{M}$   $[\text{Cu}(\text{phen})\text{Cl}_2]$ ; Lane 12,  $\lambda$  DNA + 5 unit NdeI (control); Lane 13,  $\lambda$  DNA + 5 unit NdeI +  $50 \mu\text{M}$   $[\text{Cu}(\text{phen})\text{Cl}_2]$ ; Lane 14,  $\lambda$  DNA + 5 unit Bst 11071 (control); Lane 15,  $\lambda$  DNA + 5 unit Bst 11071 +  $50 \mu\text{M}$   $[\text{Cu}(\text{phen})\text{Cl}_2]$ ; Lane 16, 1kb DNA ladder.

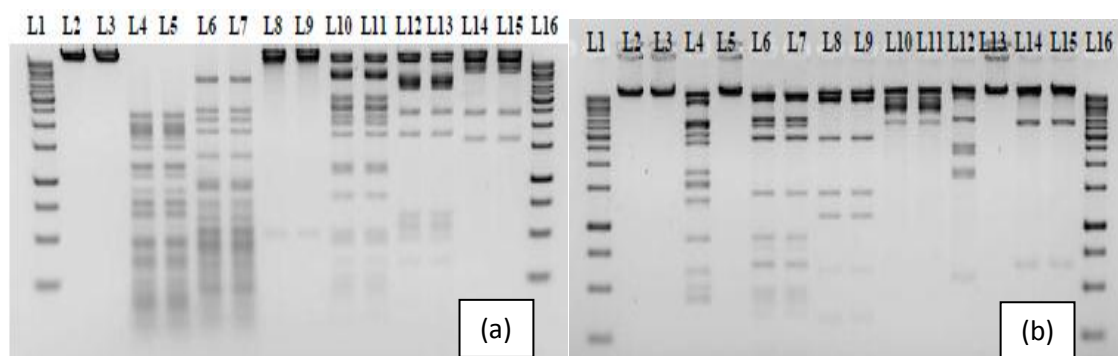

Figure S3.3 RE inhibition by **1**. Electrophoresis results of incubating  $\lambda$  DNA ( $0.5 \mu\text{g}/\mu\text{L}$ ) with 5 unit of restriction enzyme in the presence or absence of  $50 \mu\text{M}$  **1** for 2 hours at  $37^\circ\text{C}$ .

(a) Lane 1, 1kb DNA ladder; Lane 2,  $\lambda$  DNA alone ( $0.5 \mu\text{g}$ ); Lane 3,  $\lambda$  DNA +  $50 \mu\text{M}$  **1**; Lane 4,  $\lambda$  DNA + 5 unit Tsp 509I (control); Lane 5,  $\lambda$  DNA + 5 unit Tsp 509I +  $50 \mu\text{M}$  **1**; Lane 6,  $\lambda$  DNA + 5 unit Hae III (control); Lane 7,  $\lambda$  DNA + 5 unit Hae III +  $50 \mu\text{M}$  **1**; Lane 8,  $\lambda$  DNA + 5 unit Sal I (control); Lane 9,  $\lambda$  DNA + 5 unit Sal I +  $50 \mu\text{M}$  **1**; Lane 10,  $\lambda$  DNA + 5 unit Pst I (control); Lane 11,  $\lambda$  DNA + 5 unit Pst I +  $50 \mu\text{M}$  **1**; Lane 12,  $\lambda$  DNA + 5 unit Pvu II (control); Lane 13,  $\lambda$  DNA + 5 unit Pvu II +  $50 \mu\text{M}$  **1**; Lane 14,  $\lambda$  DNA + 5 unit Sca I (control); Lane 15,  $\lambda$  DNA + 5 unit Sca I +  $50 \mu\text{M}$  **1**; Lane 16, 1kb DNA ladder.

(b) Lane 1, 1kb DNA ladder; Lane 2,  $\lambda$  DNA alone ( $0.5 \mu\text{g}$ ); Lane 3,  $\lambda$  DNA +  $50 \mu\text{M}$  **1**; Lane 4,  $\lambda$  DNA + 5 unit Ssp I (control); Lane 5,  $\lambda$  DNA + 5 unit Ssp I +  $50 \mu\text{M}$  **1**; Lane 6,  $\lambda$  DNA + 5 unit Ase I (control); Lane 7,  $\lambda$  DNA + 5 unit Ase I +  $50 \mu\text{M}$  **1**; Lane 8,  $\lambda$  DNA + 5 unit Mun I (control); Lane 9,  $\lambda$  DNA + 5 unit Mun I +  $50 \mu\text{M}$  **1**; Lane 10,  $\lambda$  DNA + 5 unit EcoR I (control); Lane 11,  $\lambda$  DNA + 5 unit EcoR I +  $50 \mu\text{M}$  **1**; Lane 12,  $\lambda$  DNA + 5 unit NdeI (control); Lane 13,  $\lambda$  DNA + 5 unit NdeI +  $50 \mu\text{M}$  **1**; Lane 14,  $\lambda$  DNA + 5 unit Bst 11071 (control); Lane 15,  $\lambda$  DNA + 5 unit Bst 11071 +  $50 \mu\text{M}$  **1**; Lane 16, 1kb DNA ladder.

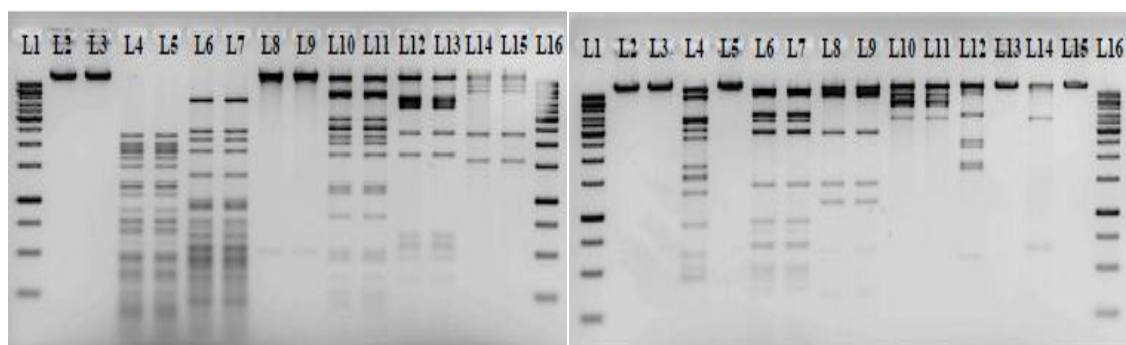

Figure S3.4 RE inhibition by **2**.

Electrophoresis results of incubating  $\lambda$  DNA ( $0.5 \mu\text{g}/\mu\text{L}$ ) with 5 unit of restriction enzyme in the presence or absence of  $50 \mu\text{M}$  **2** for 2 hours at  $37^\circ\text{C}$ .

(a) Lane 1, 1kb DNA ladder; Lane 2,  $\lambda$  DNA alone ( $0.5 \mu\text{g}$ ); Lane 3,  $\lambda$  DNA +  $50 \mu\text{M}$  **2**; Lane 4,  $\lambda$  DNA + 5 unit Tsp 509I (control); Lane 5,  $\lambda$  DNA + 5 unit Tsp 509I +  $50 \mu\text{M}$  **2**; Lane 6,  $\lambda$  DNA + 5 unit Hae III (control); Lane 7,  $\lambda$  DNA + 5 unit Hae III +  $50 \mu\text{M}$  **2**; Lane 8,  $\lambda$  DNA + 5 unit Sal I (control); Lane 9,  $\lambda$  DNA + 5 unit Sal I +  $50 \mu\text{M}$  **2**; Lane 10,  $\lambda$  DNA + 5 unit Pst I (control); Lane 11,  $\lambda$  DNA + 5 unit Pst I +  $50 \mu\text{M}$  **2**; Lane 12,  $\lambda$  DNA + 5 unit Pvu II (control); Lane 13,  $\lambda$  DNA + 5 unit Pvu II +  $50 \mu\text{M}$  **2**; Lane 14,  $\lambda$  DNA + 5 unit Sca I (control); Lane 15,  $\lambda$  DNA + 5 unit Sca I +  $50 \mu\text{M}$  **2**; Lane 16, 1kb DNA ladder.

(b) Lane 1, 1kb DNA ladder; Lane 2,  $\lambda$  DNA alone ( $0.5 \mu\text{g}$ ); Lane 3,  $\lambda$  DNA +  $50 \mu\text{M}$  **2**; Lane 4,  $\lambda$  DNA + 5 unit Ssp I (control); Lane 5,  $\lambda$  DNA + 5 unit Ssp I +  $50 \mu\text{M}$  **3**; Lane 6,  $\lambda$  DNA + 5 unit Ase I (control); Lane 7,  $\lambda$  DNA + 5 unit Ase I +  $50 \mu\text{M}$  **3**; Lane 8,  $\lambda$  DNA + 5 unit Mun I (control); Lane 9,  $\lambda$  DNA + 5 unit Mun I +  $50 \mu\text{M}$  **2**; Lane 10,  $\lambda$  DNA + 5 unit EcoR I (control); Lane 11,  $\lambda$  DNA + 5 unit EcoR I +  $50 \mu\text{M}$  **2**; Lane 12,  $\lambda$  DNA + 5 unit NdeI (control); Lane 13,  $\lambda$  DNA + 5 unit NdeI +  $50 \mu\text{M}$  **2**; Lane 14,  $\lambda$  DNA + 5 unit Bst 11071 (control); Lane 15,  $\lambda$  DNA + 5 unit Bst 11071 +  $50 \mu\text{M}$  **2**; Lane 16, 1kb DNA ladder.

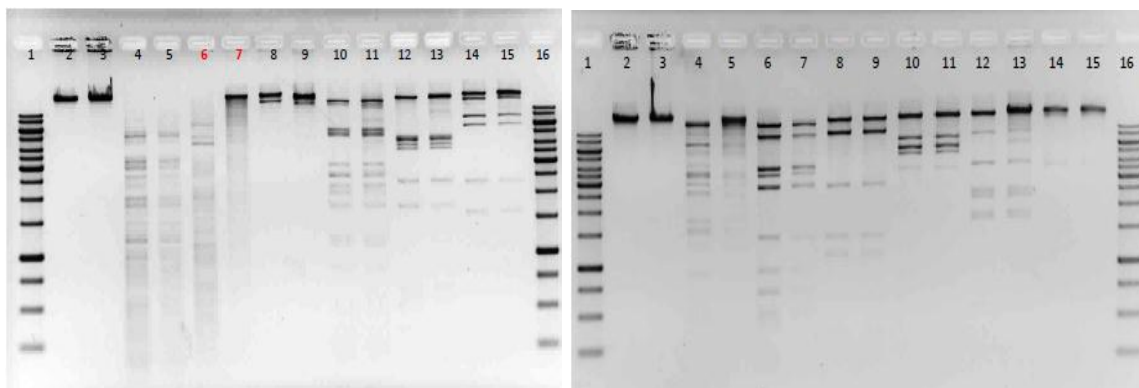

Figure S3.5 RE inhibition by **3**.

Electrophoresis results of incubating  $\lambda$  DNA ( $0.5 \mu\text{g}/\mu\text{L}$ ) with 5 unit of restriction enzyme in the presence or absence of  $50 \mu\text{M}$  **3** for 2 hours at  $37^\circ\text{C}$ .

(a) Lane 1, 1kb DNA ladder; Lane 2,  $\lambda$  DNA alone ( $0.5 \mu\text{g}$ ); Lane 3,  $\lambda$  DNA +  $50 \mu\text{M}$  **3**; Lane 4,  $\lambda$  DNA + 5 unit Tsp 509I (control); Lane 5,  $\lambda$  DNA + 5 unit Tsp 509I +  $50 \mu\text{M}$  **3**; Lane 6,  $\lambda$  DNA + 5 unit Hae III (control); Lane 7,  $\lambda$  DNA + 5 unit Hae III +  $50 \mu\text{M}$  **3**; Lane 8,  $\lambda$  DNA + 5 unit Sal I (control); Lane 9,  $\lambda$  DNA + 5 unit Sal I +  $50 \mu\text{M}$  **3**; Lane 10,  $\lambda$  DNA + 5 unit Pst I (control); Lane 11,  $\lambda$  DNA + 5 unit Pst I +  $50 \mu\text{M}$  **3**; Lane 12,  $\lambda$  DNA + 5 unit Pvu II (control); Lane 13,  $\lambda$  DNA + 5 unit Pvu II +  $50 \mu\text{M}$  **3**; Lane 14,  $\lambda$  DNA + 5 unit Sca I (control); Lane 15,  $\lambda$  DNA + 5 unit Sca I +  $50 \mu\text{M}$  **3**; Lane 16, 1kb DNA ladder.

(b) Lane 1, 1kb DNA ladder; Lane 2,  $\lambda$  DNA alone ( $0.5 \mu\text{g}$ ); Lane 3,  $\lambda$  DNA +  $50 \mu\text{M}$  **3**; Lane 4,  $\lambda$  DNA + 5 unit Ssp I (control); Lane 5,  $\lambda$  DNA + 5 unit Ssp I +  $50 \mu\text{M}$  **3**; Lane 6,  $\lambda$  DNA + 5 unit Ase I (control); Lane 7,  $\lambda$  DNA + 5 unit Ase I +  $50 \mu\text{M}$  **3**; Lane 8,  $\lambda$  DNA + 5 unit Mun I (control); Lane 9,  $\lambda$  DNA + 5 unit Mun I +  $50 \mu\text{M}$  **3**; Lane 10,  $\lambda$  DNA + 5 unit EcoR I (control); Lane 11,  $\lambda$  DNA + 5 unit EcoR I +  $50 \mu\text{M}$  **3**; Lane 12,  $\lambda$  DNA + 5 unit NdeI (control); Lane 13,  $\lambda$  DNA + 5 unit NdeI +  $50 \mu\text{M}$  **3**; Lane 14,  $\lambda$  DNA + 5 unit Bst 11071 (control); Lane 15,  $\lambda$  DNA + 5 unit Bst 11071 +  $50 \mu\text{M}$  **3**; Lane 16, 1kb DNA ladder.

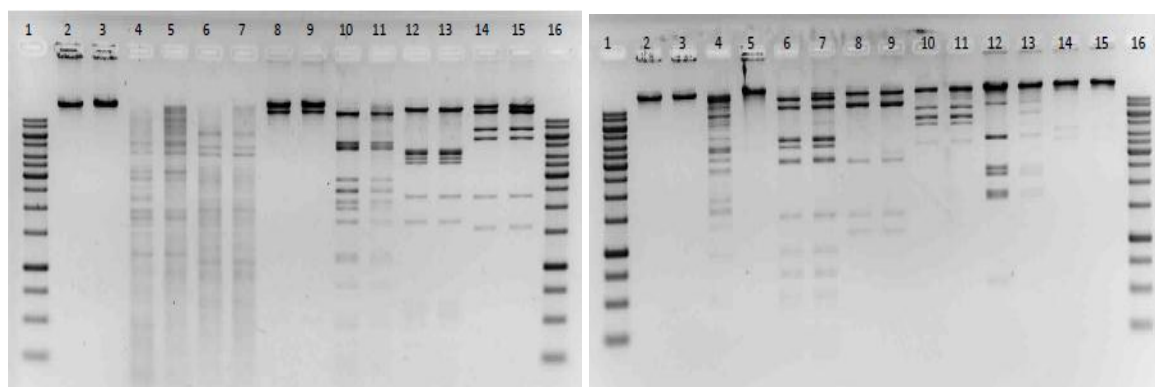

Figure S3.6 RE inhibition by **4**.

Electrophoresis results of incubating  $\lambda$  DNA ( $0.5 \mu\text{g}/\mu\text{L}$ ) with 5 unit of restriction enzyme in the presence or absence of  $50 \mu\text{M}$  **4** for 2 hours at  $37^\circ\text{C}$ .

(a) Lane 1, 1kb DNA ladder; Lane 2,  $\lambda$  DNA alone ( $0.5 \mu\text{g}$ ); Lane 3,  $\lambda$  DNA +  $50 \mu\text{M}$  **4**; Lane 4,  $\lambda$  DNA + 5 unit Tsp 509I (control); Lane 5,  $\lambda$  DNA + 5 unit Tsp 509I +  $50 \mu\text{M}$  **4**; Lane 6,  $\lambda$  DNA + 5 unit Hae III (control); Lane 7,  $\lambda$  DNA + 5 unit Hae III +  $50 \mu\text{M}$  **4**; Lane 8,  $\lambda$  DNA + 5 unit Sal I (control); Lane 9,  $\lambda$  DNA + 5 unit Sal I +  $50 \mu\text{M}$  **4**; Lane 10,  $\lambda$  DNA + 5 unit Pst I (control); Lane 11,  $\lambda$  DNA + 5 unit Pst I +  $50 \mu\text{M}$  **4**; Lane 12,  $\lambda$  DNA + 5 unit Pvu II (control); Lane 13,  $\lambda$  DNA + 5 unit Pvu II +  $50 \mu\text{M}$  **4**; Lane 14,  $\lambda$  DNA + 5 unit Sca I (control); Lane 15,  $\lambda$  DNA + 5 unit Sca I +  $50 \mu\text{M}$  **4**; Lane 16, 1kb DNA ladder.

(b) Lane 1, 1kb DNA ladder; Lane 2,  $\lambda$  DNA alone ( $0.5 \mu\text{g}$ ); Lane 3,  $\lambda$  DNA +  $50 \mu\text{M}$  **4**; Lane 4,  $\lambda$  DNA + 5 unit Ssp I (control); Lane 5,  $\lambda$  DNA + 5 unit Ssp I +  $50 \mu\text{M}$  **4**; Lane 6,  $\lambda$  DNA + 5 unit Ase I (control); Lane 7,  $\lambda$  DNA + 5 unit Ase I +  $50 \mu\text{M}$  **4**; Lane 8,  $\lambda$  DNA + 5 unit Mun I (control); Lane 9,  $\lambda$  DNA + 5 unit Mun I +  $50 \mu\text{M}$  **4**; Lane 10,  $\lambda$  DNA + 5 unit EcoR I (control); Lane 11,  $\lambda$  DNA + 5 unit EcoR I +  $50 \mu\text{M}$  **4**; Lane 12,  $\lambda$  DNA + 5 unit NdeI (control); Lane 13,  $\lambda$  DNA + 5 unit NdeI +  $50 \mu\text{M}$  **4**; Lane 14,  $\lambda$  DNA + 5 unit Bst 11071 (control); Lane 15,  $\lambda$  DNA + 5 unit Bst 11071 +  $50 \mu\text{M}$  **4**; Lane 16, 1kb DNA ladder.



(C) FL spectra of BSA in the absence and presence of 1-4 (Figs. S4.1-S4.4 (a), (b), (c))

The experiment to obtain the FL emission spectra of BSA in the absence and presence of increasing concentration of 1-4 [0 (a), 2 (b), 4 (c), 10 (d), 20 (e), 40 (f), 100 (g), 200 (h) and 400 (i)  $\mu\text{M}$ ] were done in triplicate. See **Appendix II**.

(D) Stern-Volmer plots of  $F_0/F$  vs  $[Q]$  for 1-4 (Figs. S5.1-S5.4)

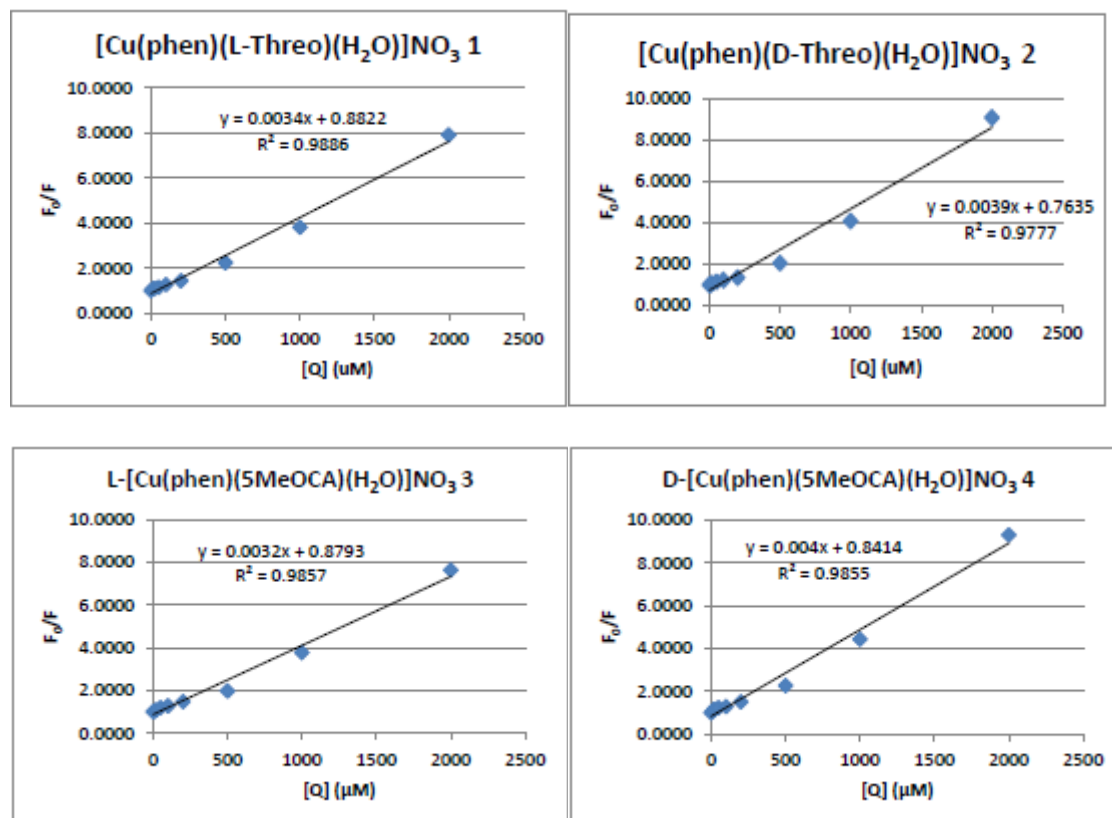

Figs. S5.1-S5.4 Stern-Volmer plots of  $F_0/F$  vs  $[Q]$  for 1-4

(E) Plots of  $\log(\Delta F/F)$  vs  $\log[Q]$  for **1-4** (Figs. S6.1-S6.4)

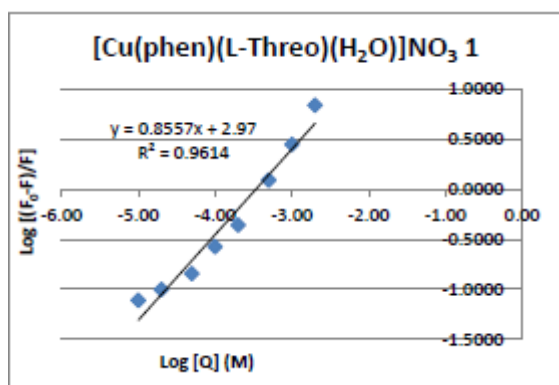

Fig. S6.1

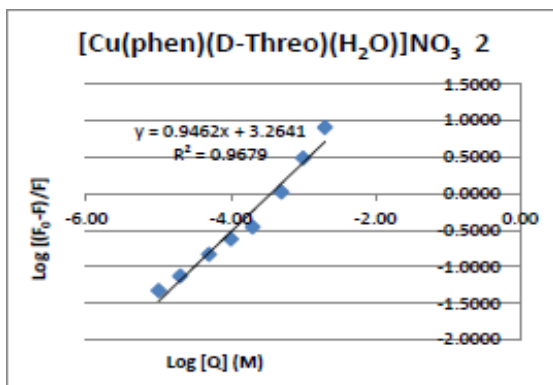

Fig. S6.2

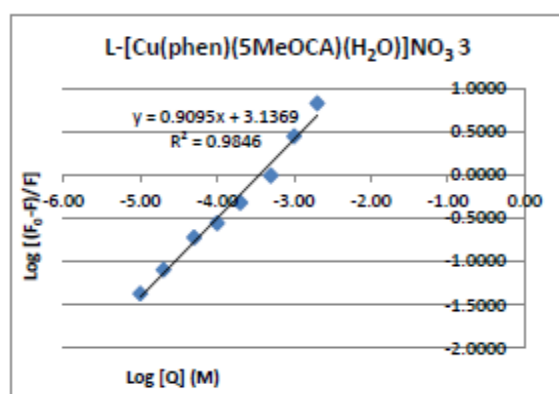

Figs. S6.3

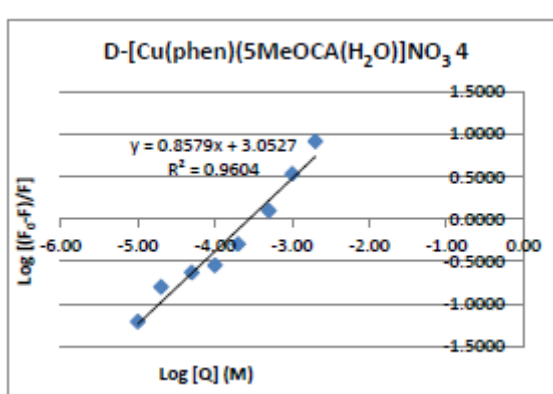

Fig. S6.4

Figs. S6.1-S6.4 Plots of  $\log(\Delta F/F)$  vs  $\log[Q]$  for **1-4**.

(F) UV spectra of BSA in absence and presence of increasing concentration of **1-4** (Figs. S671-S7.4)

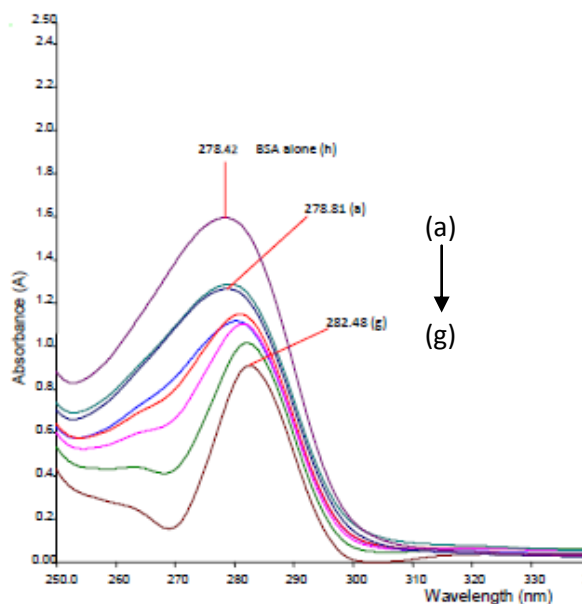

Fig. S7.1 for **1**

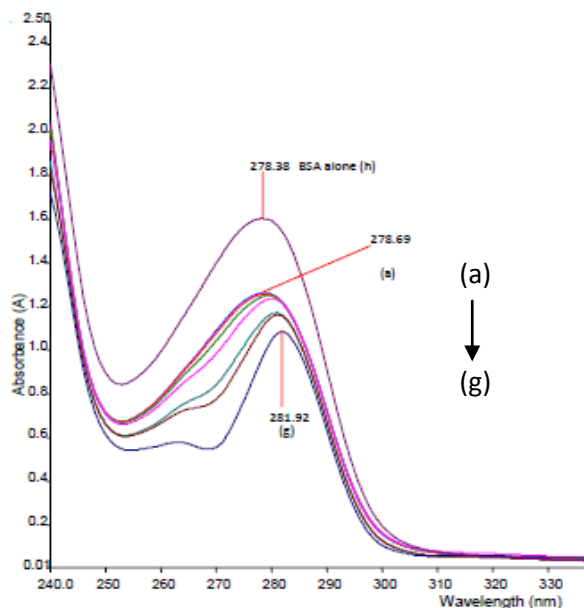

Fig. S7.2 for **2**

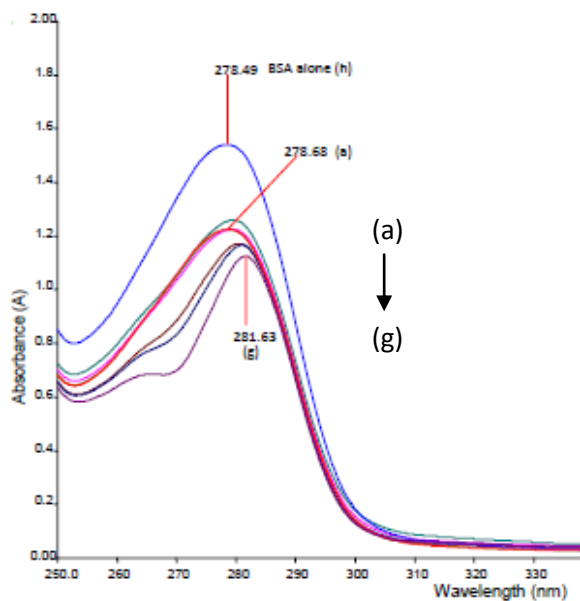

Fig. S7.3 for **3**

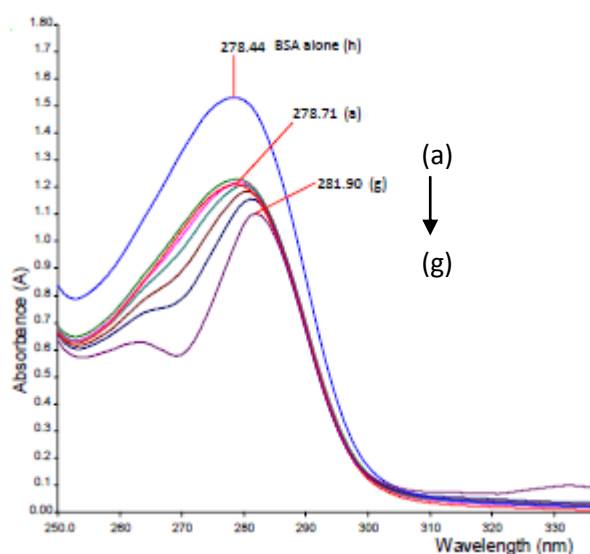

Fig. S7.4 for **4**

Figures S7.1-S7.4. Absorption spectra of BSA in the absence (h) and presence of increasing concentration [2 (a), 4 (b), 10 (c), 20 (d), 30 (e), 40 (f) and 50  $\mu\text{M}$  (g)] of copper(II) complexes (1-4). Concentration of BSA alone in the absence of complex was 32.5  $\mu\text{M}$  (h).

(G) Synchronous FL spectra of BSA in the absence (*a*) and presence of increasing concentration [2 (*b*), 4 (*c*), 10 (*d*), 20 (*e*), 40 (*f*), 100 (*g*), 200 (*h*) and 400 (*i*)  $\mu\text{M}$ ] of **1-4** at (a)  $\Delta\lambda = 15 \text{ nm}$  (tyrosine); (b)  $\Delta\lambda = 60 \text{ nm}$  (tryptophan) (Figs. S8.1-S8.4 (a) and (b))

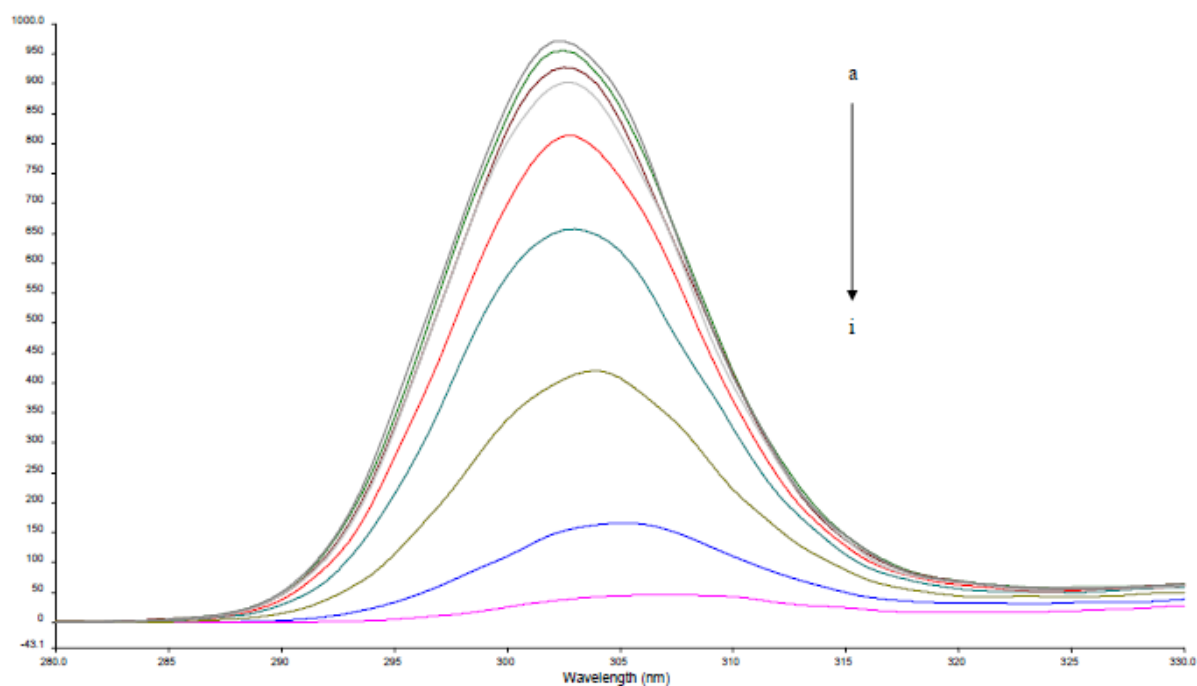

Fig. S8.1(a) for **1**

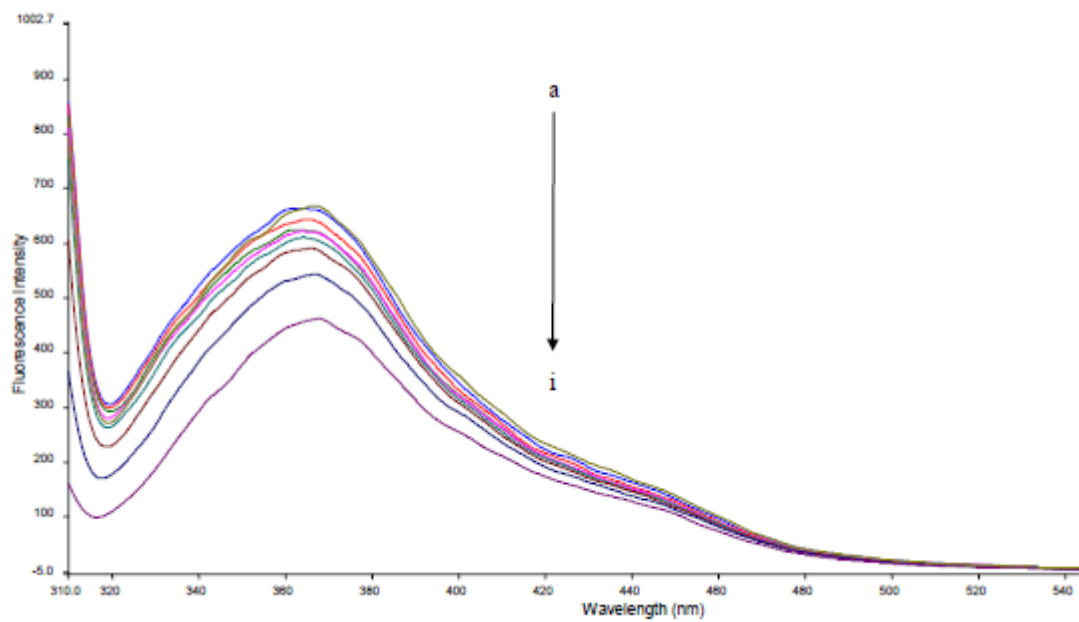

Fig. S8.1(b) for **1**

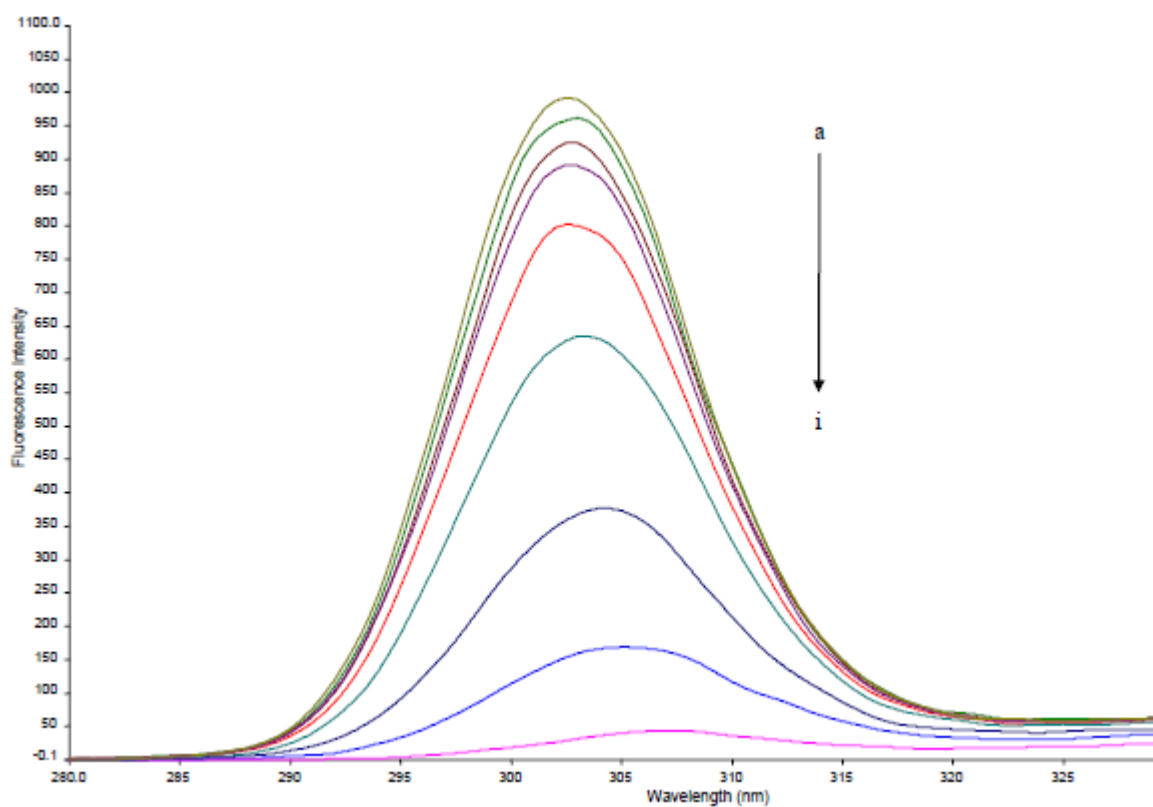

Fig. 8.2(a) for **2**

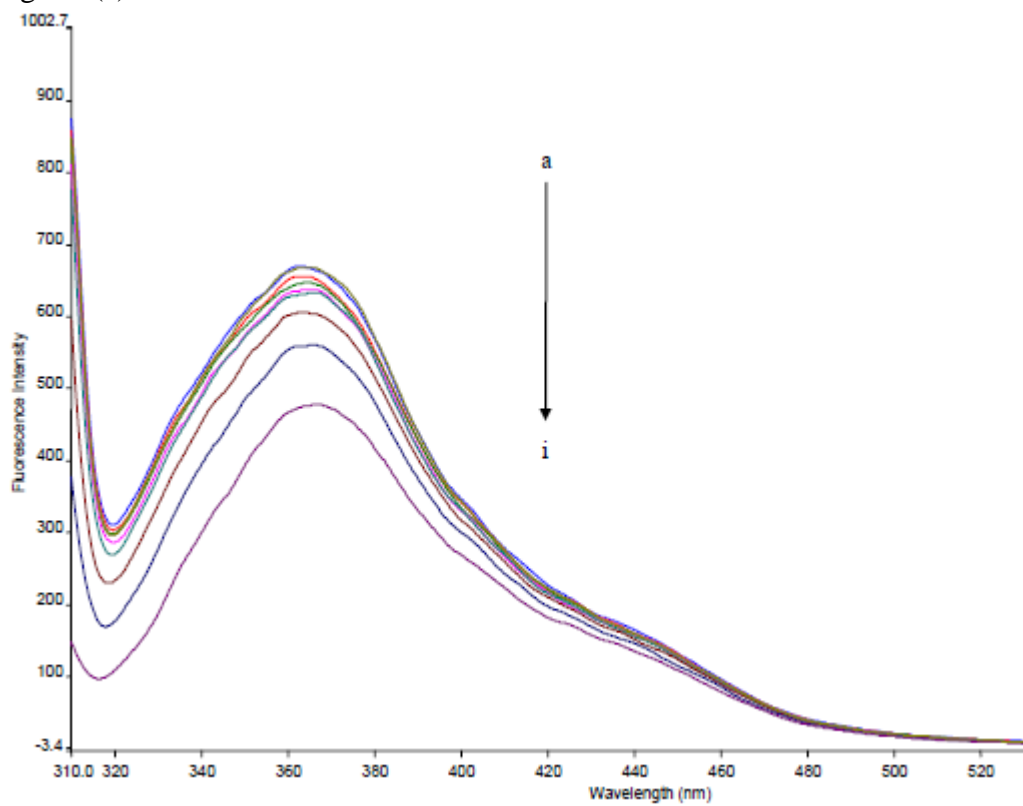

Fig. 8.2(b) for **2**

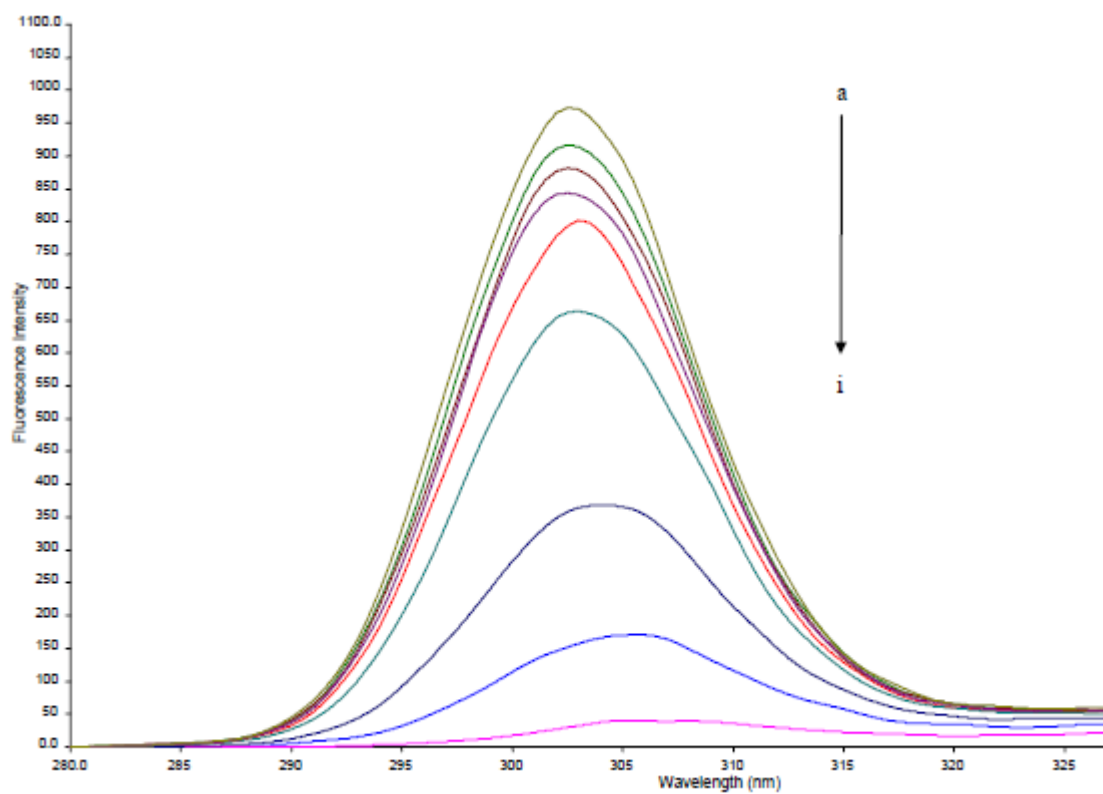

Fig. 8.3(a) for **3**

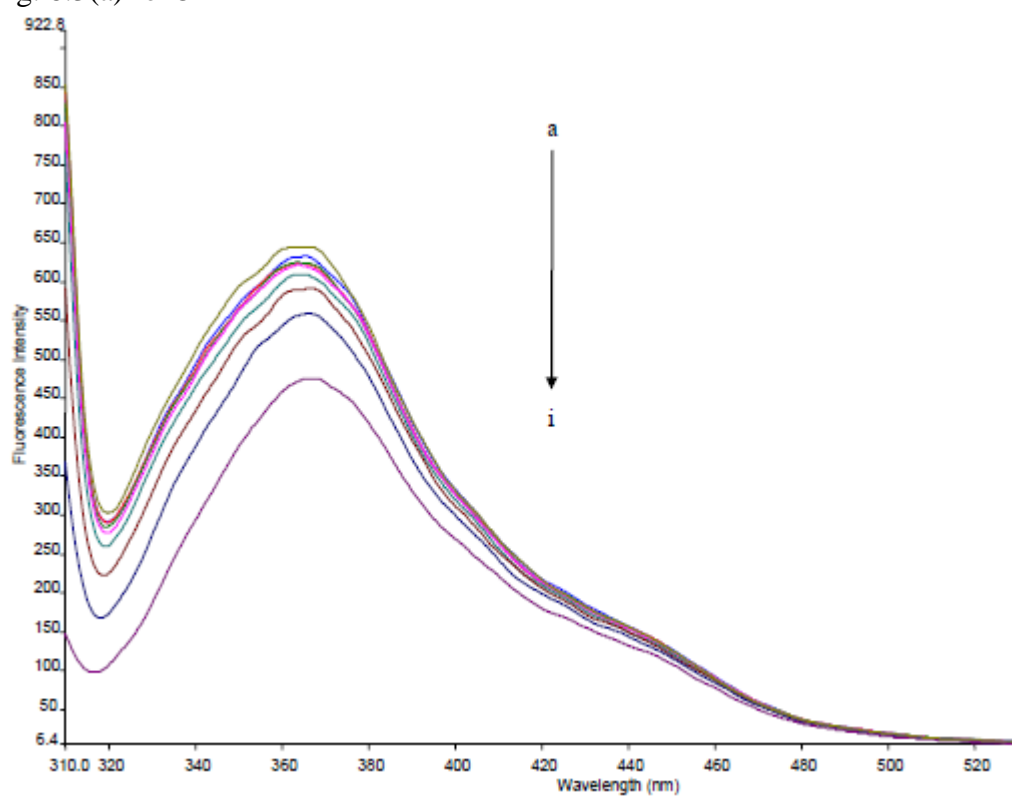

Fig. 8.3(b) for **3**

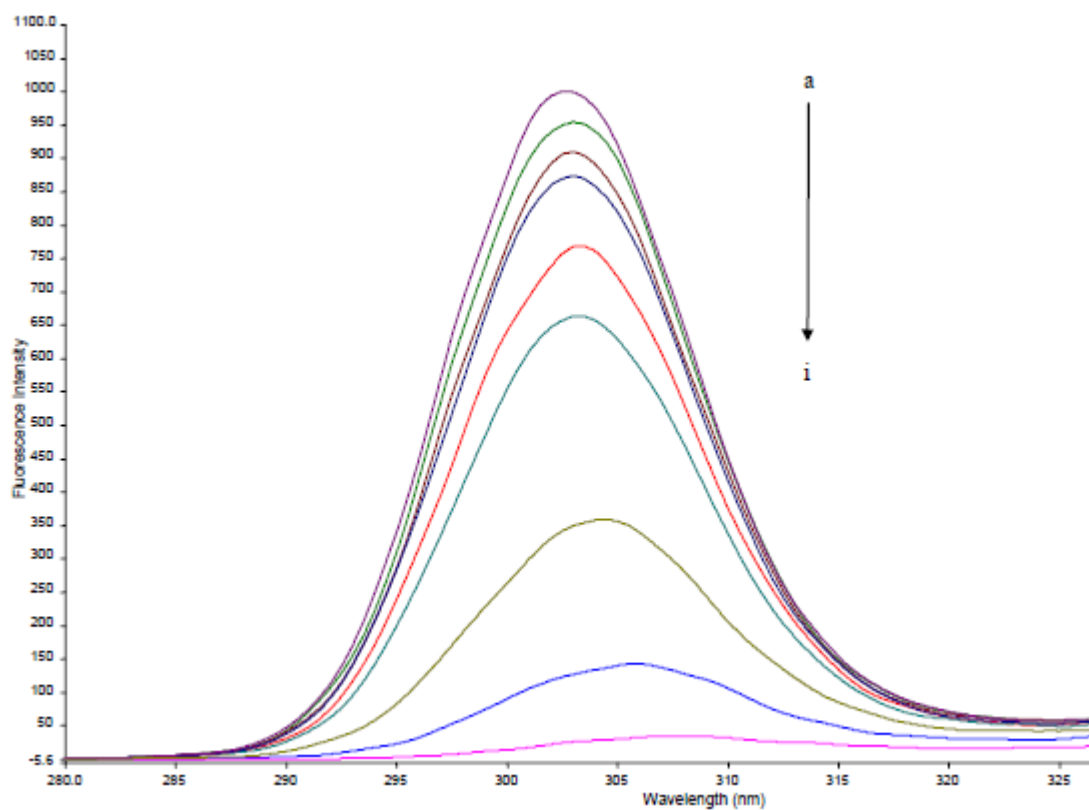

Fig. S8.4(a) for **4**

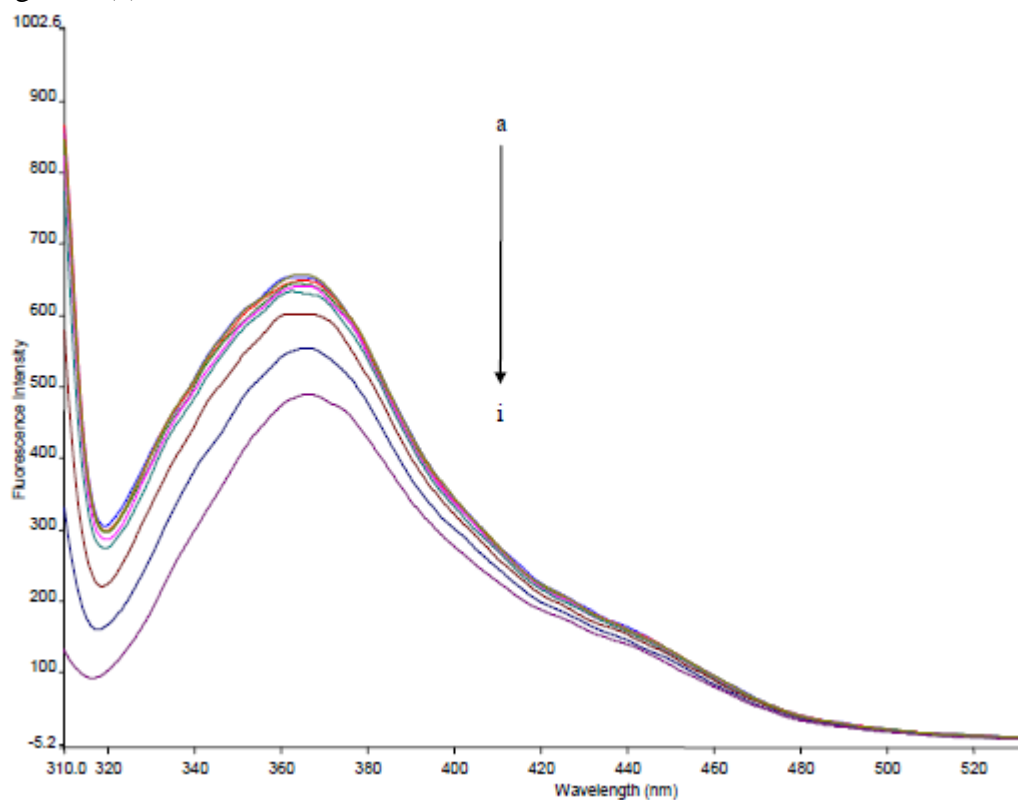

Fig. S8.4(b) for **4**

Figs. S8.1-S8.4 Synchronous FL spectra of BSA in the absence (*a*) and presence of increasing concentration of **1-4** [2 (*b*), 4 (*c*), 10 (*d*), 20 (*e*), 40 (*f*), 100 (*g*), 200 (*h*) and 400 (*i*)  $\mu\text{M}$ ] at (a)  $\Delta\lambda = 15$  nm (tyrosine); (b)  $\Delta\lambda = 60$  nm (tryptophan)

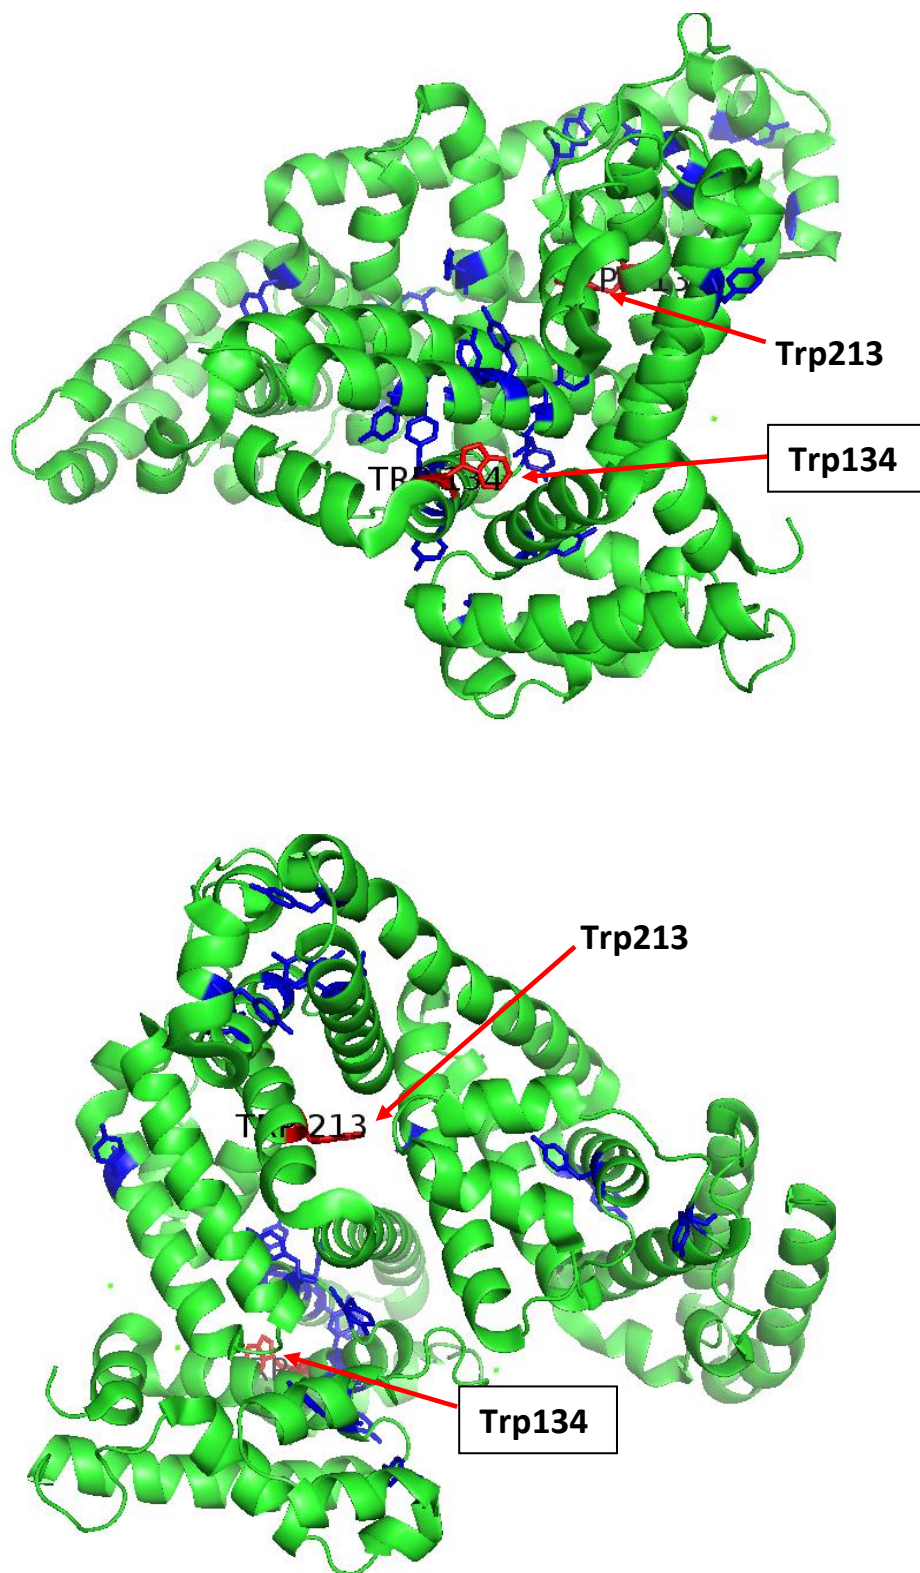

Fig. S9 Comparison of Trp134 and Trp213 binding sites. The **Trp134-binding site** (Top) (Red = Trp134; blue = Tyr residue) has Trp134 with nearby Tyr residues (140, 142, 148, 149, 153). Trp134 is located in the hydrophobic pocket of subdomain IA near the protein surface. **Trp213-binding site** (bottom) contains Trp213 with no nearby Tyr residues but has charged Arg and Asp residues (not shown). Trp213 is in the hydrophobic core of subdomain IIA



Supplementary Tables S1 and S2

Crystallographic data and selected bond lengths and angles of **3** and **4**

Table S1 Crystal data and structure refinement for **3** and **4**

|                                                     | <b>3</b>                                                                                                                                            | <b>4</b>                                                                                                                                      |
|-----------------------------------------------------|-----------------------------------------------------------------------------------------------------------------------------------------------------|-----------------------------------------------------------------------------------------------------------------------------------------------|
| Empirical formula                                   | C <sub>17</sub> H <sub>19.25</sub> N <sub>4</sub> O <sub>7.63</sub> Cu                                                                              | C <sub>17</sub> H <sub>19.25</sub> N <sub>4</sub> O <sub>7.63</sub> Cu                                                                        |
| Formula weight                                      | 465.15                                                                                                                                              | 465.15                                                                                                                                        |
| Temperature, K                                      | 103(2)                                                                                                                                              | 100(2)                                                                                                                                        |
| Wavelength, Å                                       | 0.71073                                                                                                                                             | 0.71073                                                                                                                                       |
| Crystal system                                      | Triclinic                                                                                                                                           | Triclinic                                                                                                                                     |
| Space group                                         | <i>P1</i>                                                                                                                                           | <i>P1</i>                                                                                                                                     |
| Unit cell dimensions                                | <i>a</i> = 7.6300(4) Å $\alpha$ = 81.2860(10)°<br><i>b</i> = 10.8699(7) Å $\beta$ = 84.1770(10)°<br><i>c</i> = 11.7670(7) Å $\gamma$ = 75.6260(10)° | <i>a</i> = 7.6383(3) Å $\alpha$ = 81.250(2)°<br><i>b</i> = 10.8787(4) Å $\beta$ = 84.085(2)°<br><i>c</i> = 11.7750(4) Å $\gamma$ = 75.541(2)° |
| Volume, Å <sup>3</sup>                              | 932.38(10)                                                                                                                                          | 934.26(6)                                                                                                                                     |
| <i>Z</i>                                            | 2                                                                                                                                                   | 2                                                                                                                                             |
| Density (calculated), mg/m <sup>3</sup>             | 1.657                                                                                                                                               | 1.654                                                                                                                                         |
| Absorption coefficient, mm <sup>-1</sup>            | 1.226                                                                                                                                               | 1.223                                                                                                                                         |
| <i>F</i> (000)                                      | 479                                                                                                                                                 | 479                                                                                                                                           |
| Crystal size, mm <sup>3</sup>                       | 0.40 x 0.20 x 0.20                                                                                                                                  | 0.40 x 0.38 x 0.20                                                                                                                            |
| $\theta$ range for data collection                  | 2.45 to 30.56°                                                                                                                                      | 2.45 to 26.37°                                                                                                                                |
| Index ranges                                        | -7 ≤ <i>h</i> ≤ 9, -13 ≤ <i>k</i> ≤ 13, -14 ≤ <i>l</i> ≤ 14                                                                                         | -9 ≤ <i>h</i> ≤ 9, -13 ≤ <i>k</i> ≤ 13, -14 ≤ <i>l</i> ≤ 14                                                                                   |
| Reflections collected                               | 11702                                                                                                                                               | 25521                                                                                                                                         |
| Independent reflections                             | 5712 [ <i>R</i> (int) = 0.0456]                                                                                                                     | 6572 [ <i>R</i> (int) = 0.0440]                                                                                                               |
| Absorption correction                               | Multi-scan                                                                                                                                          | Multi-scan                                                                                                                                    |
| Max. and min. transmission                          | 0.7916 and 0.6399                                                                                                                                   | 0.7920 and 0.6404                                                                                                                             |
| Refinement method                                   | Full-matrix least-squares on <i>F</i> <sup>2</sup>                                                                                                  | Full-matrix least-squares on <i>F</i> <sup>2</sup>                                                                                            |
| Data / restraints / parameters                      | 5984 / 3 / 549                                                                                                                                      | 6972 / 17 / 557                                                                                                                               |
| Goodness-of-fit on <i>F</i> <sub>2</sub>            | 1.043                                                                                                                                               | 1.074                                                                                                                                         |
| Final <i>R</i> indices [ <i>I</i> > 2σ( <i>I</i> )] | <i>R</i> <sub>1</sub> = 0.0272, <i>wR</i> <sub>2</sub> = 0.0703                                                                                     | <i>R</i> <sub>1</sub> = 0.0367, <i>wR</i> <sub>2</sub> = 0.0938                                                                               |
| <i>R</i> indices (all data)                         | <i>R</i> <sub>1</sub> = 0.0290, <i>wR</i> <sub>2</sub> = 0.0714                                                                                     | <i>R</i> <sub>1</sub> = 0.0337, <i>wR</i> <sub>2</sub> = 0.0873                                                                               |
| Largest diff. peak and hole, e Å <sup>-3</sup>      | 0.771 and -0.586                                                                                                                                    | 0.717 and -0.689                                                                                                                              |

Tables S2.1 and S2.2 Selected bond lengths and angles for **3** and **4**.

Table S2.1 Selected bond lengths (Å) and angles (°) for **3**

| <b>Bond lengths (Å)</b> |           |              |           |
|-------------------------|-----------|--------------|-----------|
| C(1) – O(2)             | 1.222 (5) | C(5) – O(3)  | 1.414 (4) |
| C(1) – O(1)             | 1.270 (4) | C(5) – N(1)  | 1.473 (4) |
| C(1) – C(2)             | 1.529 (4) | Cu(1) – O(1) | 1.932 (3) |
| C(2) – N(1)             | 1.485 (4) | Cu(1) – N(3) | 1.992 (4) |
| C(2) – C(3)             | 1.546 (4) | Cu(1) – N(1) | 2.002 (3) |
| C(3) – O(3)             | 1.422 (4) | Cu(1) – N(2) | 2.013 (3) |
| C(3) – C(4)             | 1.503 (5) | Cu(1) – O(4) | 2.285 (3) |

  

| <b>Bond angles (°)</b> |           |                     |             |
|------------------------|-----------|---------------------|-------------|
| O(2) – C(1) – O(1)     | 124.5 (3) | O(1) – Cu(1) – N(3) | 92.34 (13)  |
| O(2) – C(1) – C(2)     | 118.3 (3) | O(1) – Cu(1) – N(1) | 85.15 (12)  |
| O(1) – C(1) – C(2)     | 117.1 (3) | N(3) – Cu(1) – N(1) | 177.15 (15) |
| N(1) – C(2) – C(1)     | 111.2 (3) | O(1) – Cu(1) – N(2) | 169.35 (13) |
| N(1) – C(2) – C(3)     | 104.6 (3) | N(3) – Cu(1) – N(2) | 82.67 (14)  |
| C(1) – C(2) – C(3)     | 112.1 (3) | N(1) – Cu(1) – N(2) | 99.59 (13)  |
| O(3) – C(3) – C(4)     | 109.4 (3) | O(1) – Cu(1) – O(4) | 88.69 (10)  |
| O(3) – C(3) – C(2)     | 104.0 (2) | N(3) – Cu(1) – O(4) | 95.12 (12)  |
| C(4) – C(3) – C(2)     | 114.7 (3) | N(1) – Cu(1) – O(4) | 86.18 (11)  |
| O(3) – C(5) – N(1)     | 104.9 (3) | N(2) – Cu(1) – O(4) | 101.08 (11) |
| C(5) – N(1) – C(2)     | 104.2 (3) | C(5) – O(3) – C(3)  | 105.3 (2)   |
| C(5) – N(1) – Cu(1)    | 120.7 (2) | C(1) – O(1) – Cu(1) | 114.9 (2)   |
| C(2) – N(1) – Cu(1)    | 106.9 (2) |                     |             |

Table S2.2: Selected bond lengths (Å) and angles (°) for **4**

| <b>Bond lengths (Å)</b> |           |                        |             |
|-------------------------|-----------|------------------------|-------------|
| C(1A) – O(2A)           | 1.229 (5) | C(5A) – O(3A)          | 1.415 (4)   |
| C(1A) – O(1A)           | 1.272 (5) | C(5A) – N(1A)          | 1.470 (5)   |
| C(1A) – C(2A)           | 1.532 (5) | Cu(1A) – O(1A)         | 1.932 (3)   |
| C(2A) – N(1A)           | 1.484 (5) | Cu(1A) – N(3A)         | 1.990 (4)   |
| C(2A) – C(3A)           | 1.545 (5) | Cu(1A) – N(1A)         | 2.005 (3)   |
| C(3A) – O(3A)           | 1.426 (4) | Cu(1A) – N(2A)         | 2.016 (4)   |
| C(3A) – C(4A)           | 1.503 (5) | Cu(1A) – O(4A)         | 2.290 (3)   |
| <b>Bond angles (°)</b>  |           |                        |             |
| O(2A) – C(1A) – O(1A)   | 124.3 (4) | O(1A) – Cu(1A) – N(3A) | 92.36 (14)  |
| O(2A) – C(1A) – C(2A)   | 118.2 (3) | O(1A) – Cu(1A) – N(1A) | 84.97 (14)  |
| O(1A) – C(1A) – C(2A)   | 117.4 (3) | N(3A) – Cu(1A) – N(1A) | 177.04 (17) |
| N(1A) – C(2A) – C(1A)   | 110.6 (3) | O(1A) – Cu(1A) – N(2A) | 169.38 (14) |
| N(1A) – C(2A) – C(3A)   | 104.5 (3) | N(3A) – Cu(1A) – N(2A) | 82.66 (15)  |
| C(1A) – C(2A) – C(3A)   | 111.7 (3) | N(1A) – Cu(1A) – N(2A) | 99.75 (14)  |
| O(3A) – C(3A) – C(4A)   | 109.6 (3) | O(1A) – Cu(1A) – O(4A) | 88.64 (11)  |
| O(3A) – C(3A) – C(2A)   | 104.2 (3) | N(3A) – Cu(1A) – O(4A) | 94.96 (12)  |
| C(4A) – C(3A) – C(2A)   | 114.7 (3) | N(1A) – Cu(1A) – O(4A) | 86.29 (12)  |
| O(3A) – C(5A) – N(1A)   | 105.2 (3) | N(2A) – Cu(1A) – O(4A) | 101.10 (12) |
| C(5A) – N(1A) – C(2A)   | 104.4 (3) | C(5A) – O(3A) – C(3A)  | 105.1 (2)   |
| C(5A) – N(1A) – Cu(1A)  | 120.6 (3) | C(1A) – O(1A) – Cu(1A) | 114.9 (3)   |
| C(2A) – N(1A) – Cu(1A)  | 107.3 (2) |                        |             |

Table S3 UV-visible spectral data of aqueous solutions of phen and **1-4** (solvent: water-methanol 1:1 v/v)

| Compounds | $\lambda_1/\text{nm}$<br>( $\epsilon/\text{M}^{-1} \text{cm}^{-1}$ ) | $\lambda_2/\text{nm}$<br>( $\epsilon/\text{M}^{-1} \text{cm}^{-1}$ ) | $\lambda_3/\text{nm}$<br>( $\epsilon/\text{M}^{-1} \text{cm}^{-1}$ ) |
|-----------|----------------------------------------------------------------------|----------------------------------------------------------------------|----------------------------------------------------------------------|
| phen      | -                                                                    | 227(40,000)                                                          | 264(30,000)                                                          |
| <b>1</b>  | 613 (60)                                                             | 225 (60,000)                                                         | 273 (50,000)                                                         |
| <b>2</b>  | 613 (60)                                                             | 224 (30,000)                                                         | 273 (30,000)                                                         |
| <b>3</b>  | 623 (60)                                                             | 225 (40,000)                                                         | 273 (40,000)                                                         |
| <b>4</b>  | 623 (70)                                                             | 224 (40,000)                                                         | 273 (30,000)                                                         |

Concentration of compounds for visible and UV spectra are  $5 \times 10^{-3}$  M and  $3 \times 10^{-5}$  M respectively.

Table S4 Molar conductivity ( $\text{S cm}^2 \text{mol}^{-1}$ ) for **1-4** and other precursor compounds ( $1 \times 10^{-3}$  M)

| Compounds                  | 0 h  | 1 h  | 24 h |
|----------------------------|------|------|------|
| <b>1</b>                   | 50   | 50   | 50   |
| <b>2</b>                   | 50   | 50   | 50   |
| <b>3</b>                   | 50   | 50   | 50   |
| <b>4</b>                   | 50   | 50   | 50   |
| $\text{Cu}(\text{NO}_3)_2$ | 120  | 120  | 120  |
| phen                       | 1    | 1    | 1    |
| L-threo                    | 1    | 1    | 1    |
| D-threo                    | 1    | 1    | 1    |
| KCl                        | 1410 | 1410 | 1410 |
| (standard Solution)        |      |      |      |

Table S5 Restriction enzymes (REs) inhibited by copper(II) compounds

| Compounds                             | <i>Hae</i> III | <i>Ssp</i> I | <i>Ase</i> I | <i>Nde</i> I | <i>Bst</i> 11071 |
|---------------------------------------|----------------|--------------|--------------|--------------|------------------|
| $\text{CuCl}_2$                       | -              | -            | -            | -            | -                |
| $[\text{Cu}(\text{phen})\text{Cl}_2]$ | +              | +            | +            | +            | +                |
| <b>1</b>                              | -              | +            | -            | +            | -                |
| <b>2</b>                              | -              | +            | -            | +            | +                |
| <b>3</b>                              | +              | -            | -            | -            | -                |
| <b>4</b>                              | -              | -            | +            | -            | -                |

RE (binding site): *Hae* III (5'-CGGC-3'); *Ssp* I (5'-AATATT-3'); *Ase* I (5'-ATTAAT-3'); *Nde* I (5'-CATATG-3'); *Bst* 11071 (5'-GTATAC-3')
