# Supplementary material for: Ternary copper(ii)-polypyridyl enantiomers: aldol-type condensation, characterization, DNA-binding recognition, BSA-binding and anticancer property
Source: Royal Society of Chemistry journal article supplement (doi:10.1039/c3dt50884f), 2013-01-01
Supplement: c3dt50884f_2.pdf [file c3dt50884f_2.pdf]

## **Appendix II** (Fluorescence quenching of BSA by copper(II) complexes)

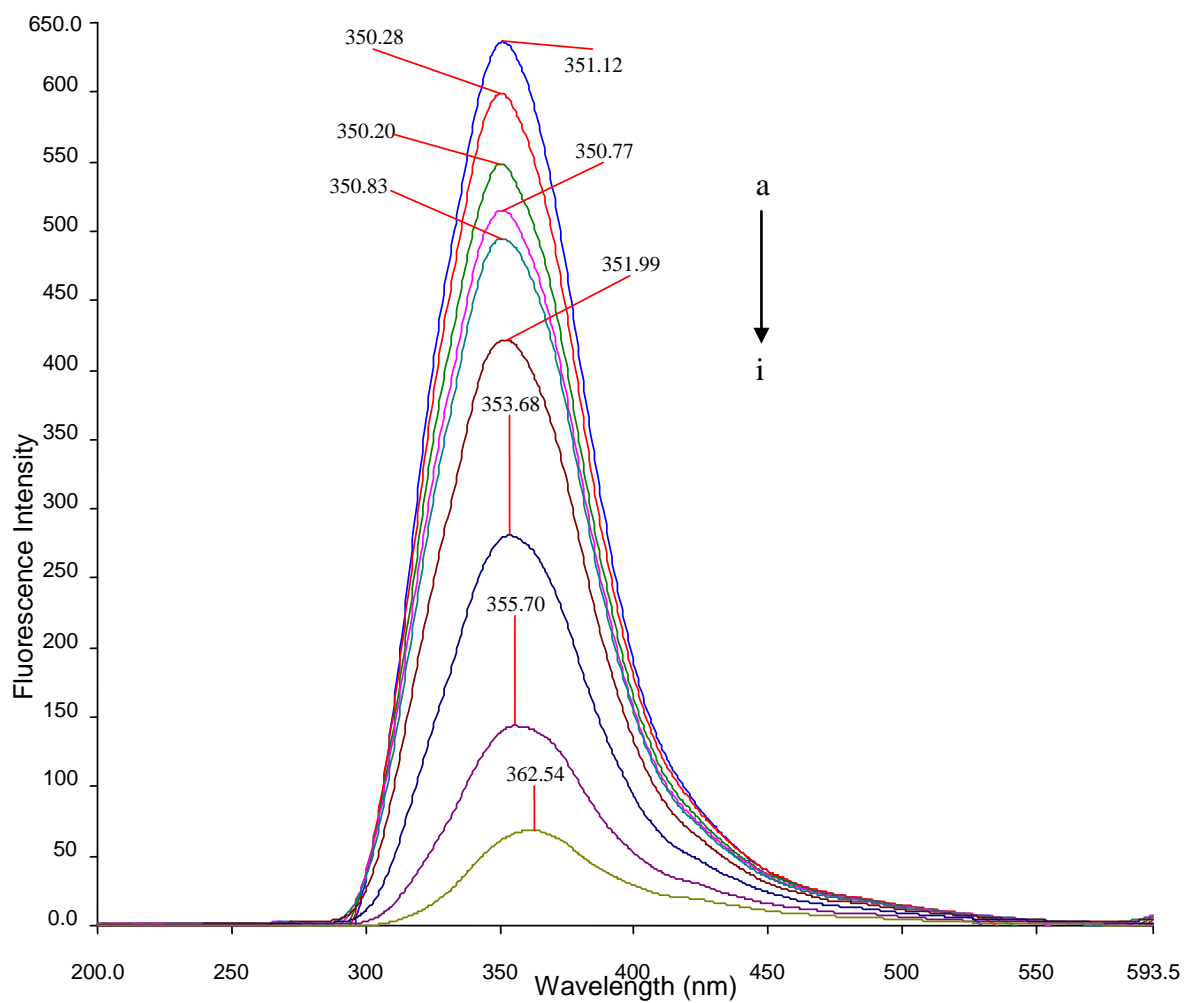

Figure S4.4(I) Fluorescence quenching of 0.24 mM BSA by increasing concentration [0 (a), 2 (b), 4 (c), 10 (d), 20 (e), 40 (f), 100 (g), 200 (h) and 400 (i) μM] of D-[Cu(phen)(5MeOCA)(H<sub>2</sub>O)NO<sub>3</sub> **4**. (First trial)

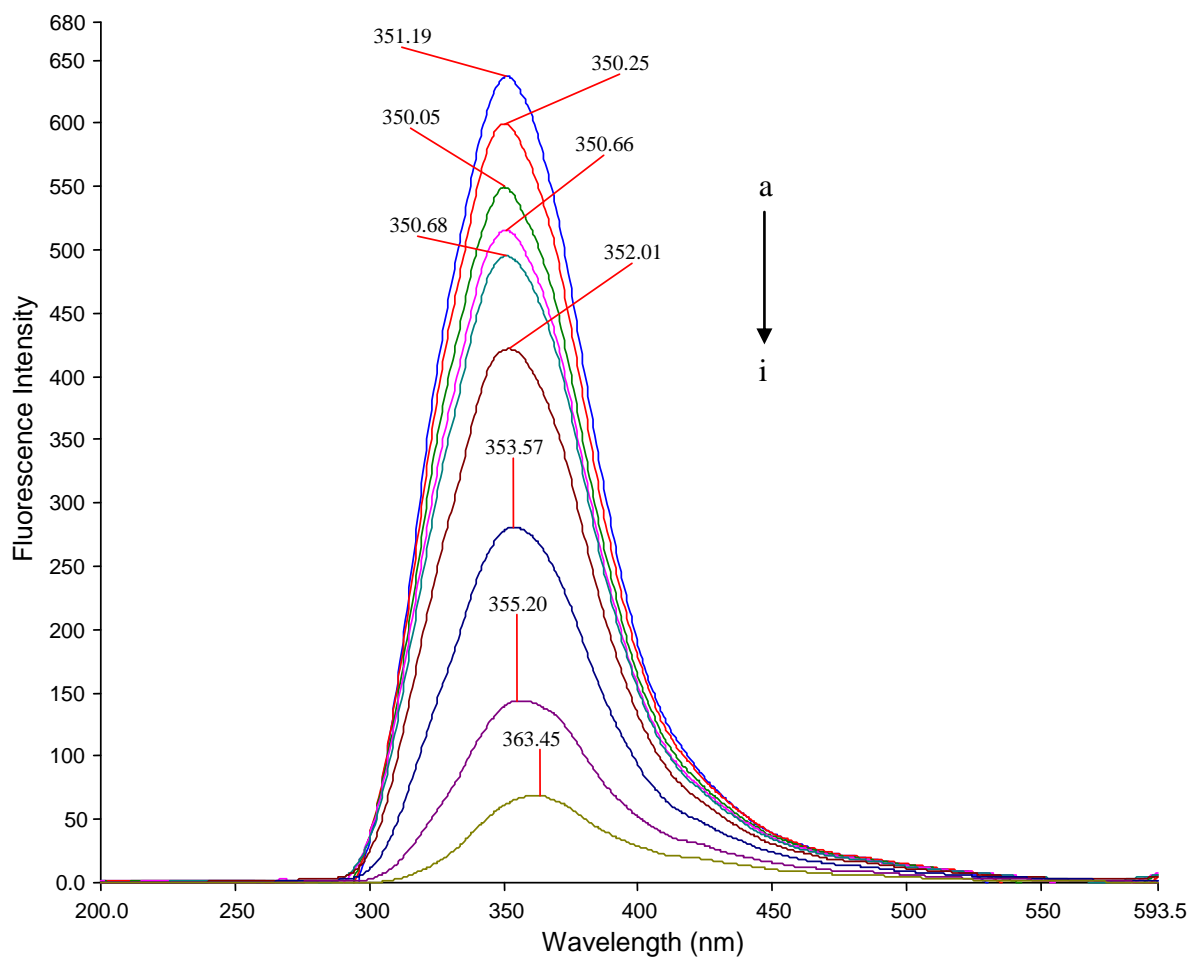

Figure S4.4(II) Fluorescence quenching of 0.24 mM BSA by increasing concentration [0 (a), 2 (b), 4 (c), 10 (d), 20 (e), 40 (f), 100 (g), 200 (h) and 400 (i) μM] of D-[Cu(phen)(5MeOCA)(H<sub>2</sub>O)NO<sub>3</sub>]**4**. (Second trial)

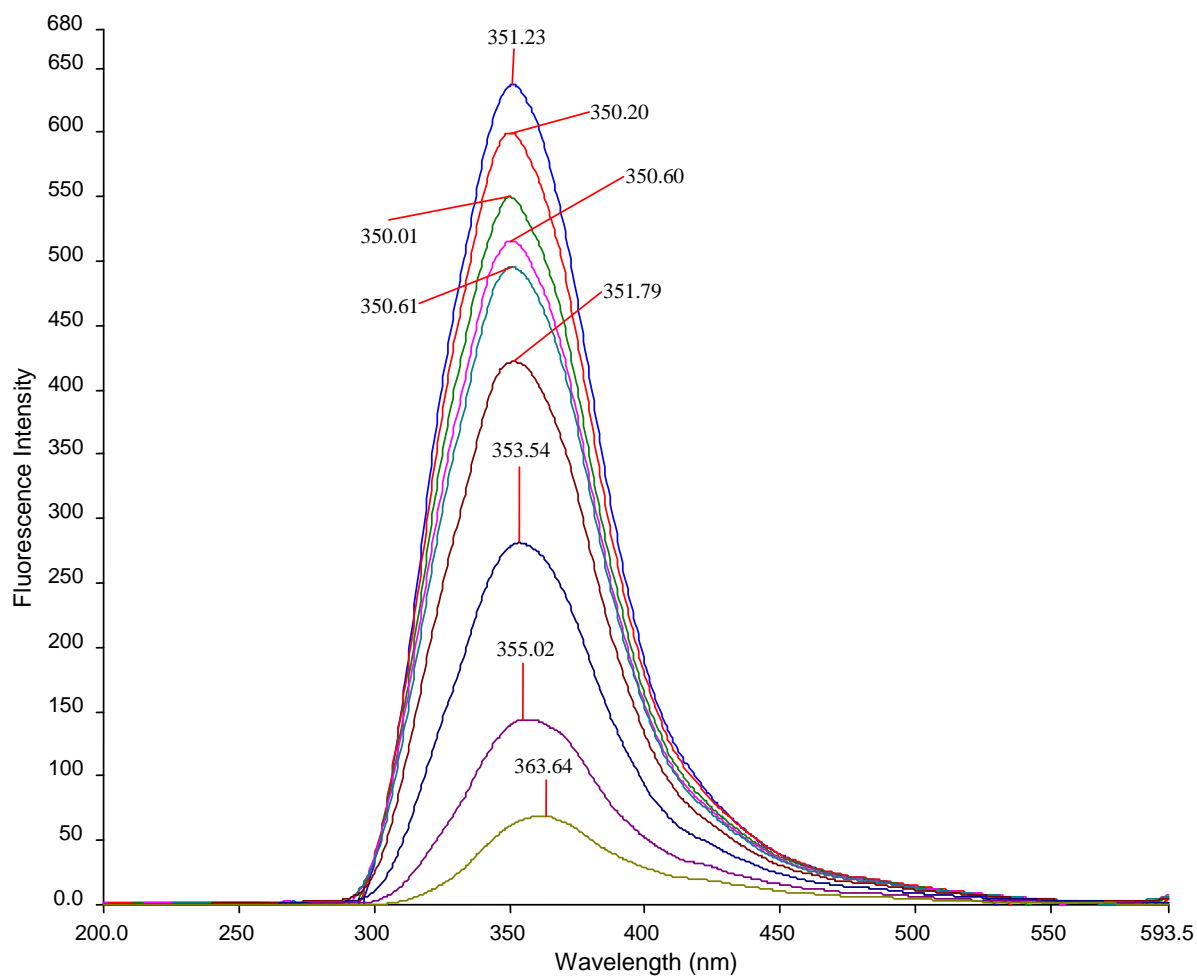

Figure S4.4(III) Fluorescence quenching of 0.24 mM BSA by increasing concentration [0 (a), 2 (b), 4 (c), 10 (d), 20 (e), 40 (f), 100 (g), 200 (h) and 400 (i)  $\mu\text{M}$ ] of D-[Cu(phen)(5MeOCA)(H<sub>2</sub>O)NO<sub>3</sub> **4**. (Third trial)

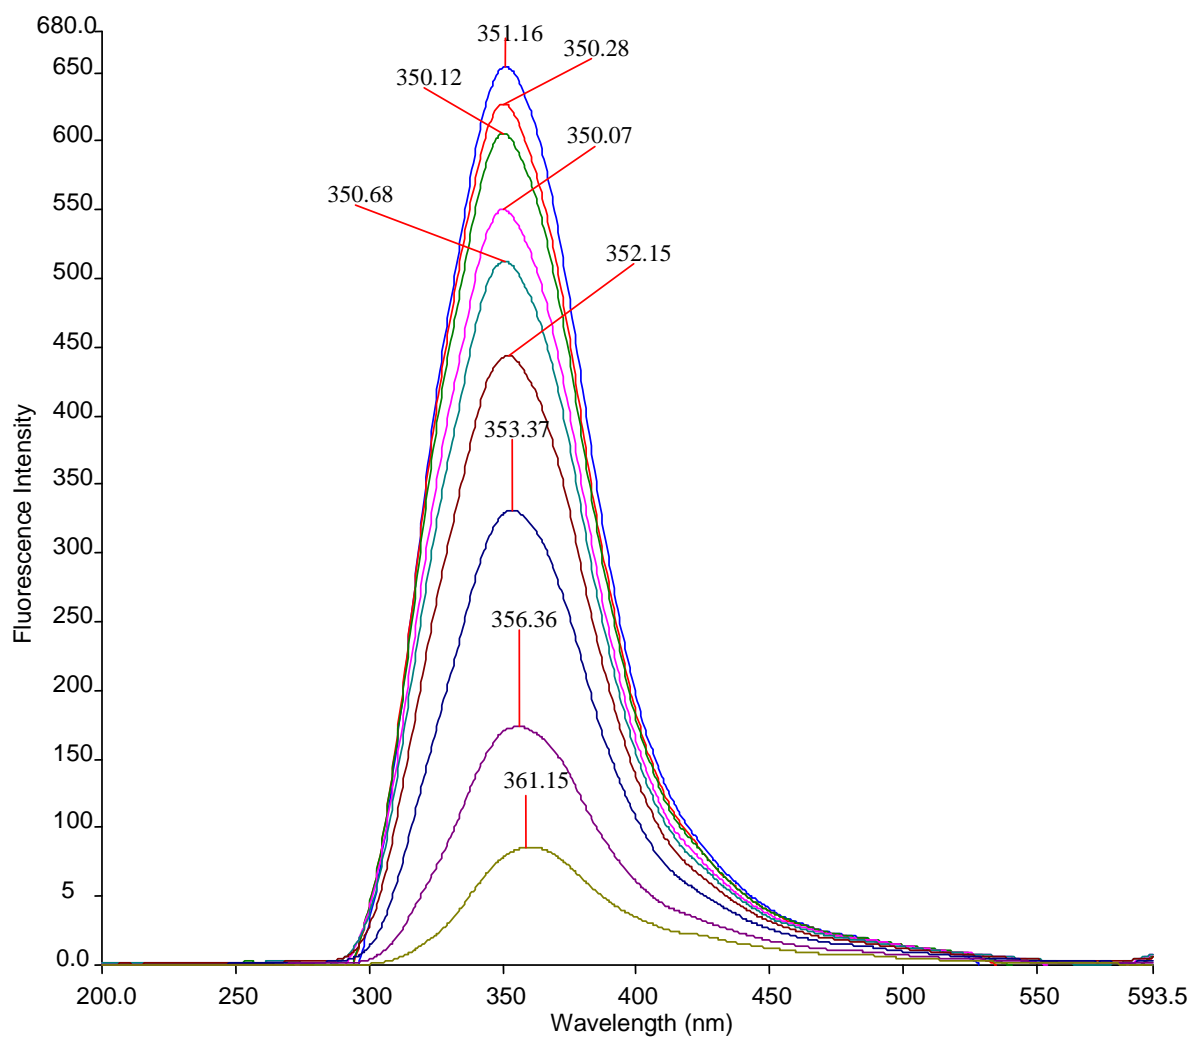

Figure S4.3(I) Fluorescence quenching of 0.24 mM BSA by increasing concentration [0 (a), 2 (b), 4 (c), 10 (d), 20 (e), 40 (f), 100 (g), 200 (h) and 400 (i)  $\mu\text{M}$ ] of L-[Cu(phen)(5MeOCA)(H<sub>2</sub>O)NO<sub>3</sub>] **3**. (First trial)

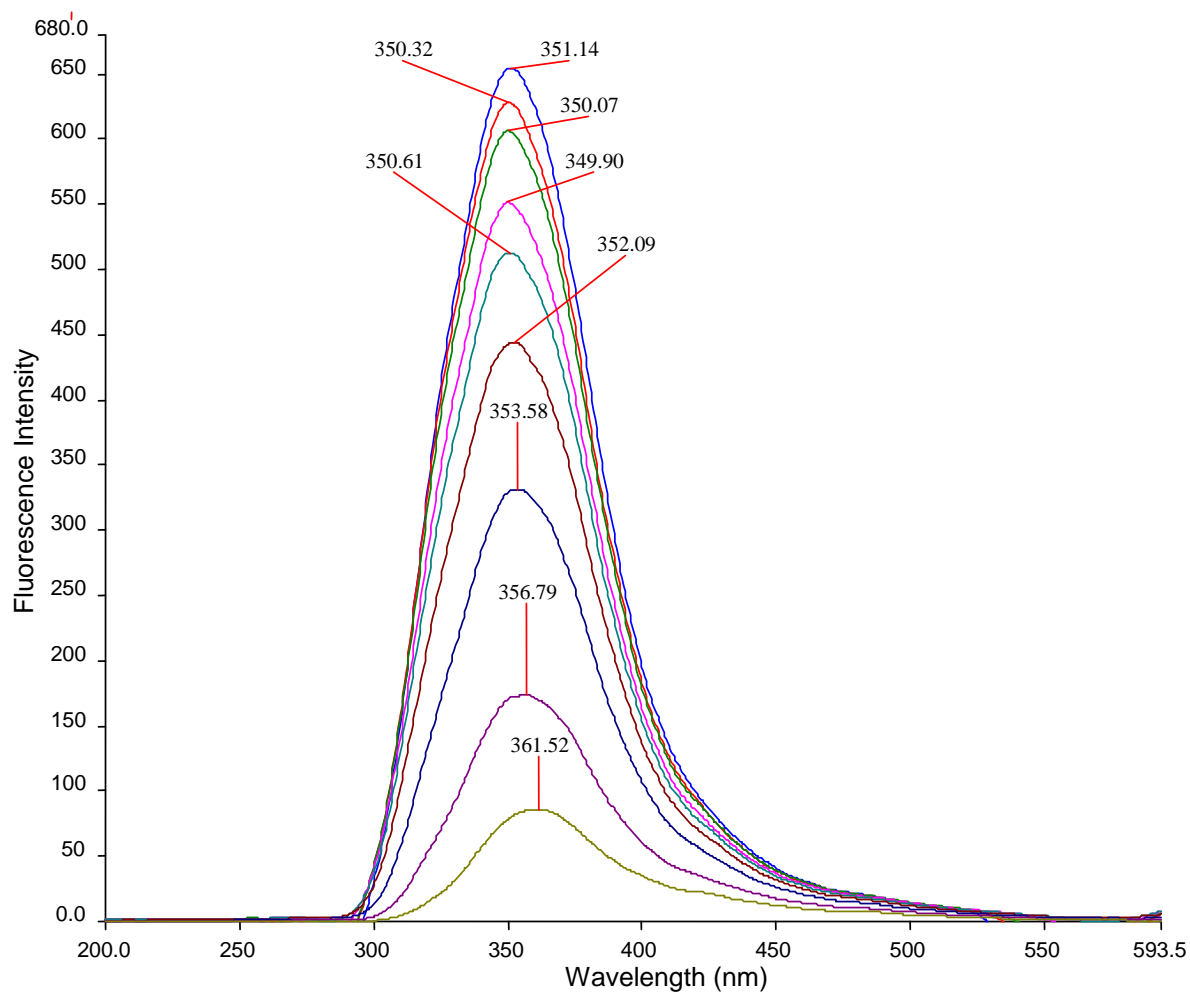

Figure S4.3(II) Fluorescence quenching of 0.24 mM BSA by increasing concentration [0 (a), 2 (b), 4 (c), 10 (d), 20 (e), 40 (f), 100 (g), 200 (h) and 400 (i) μM] of L-[Cu(phen)(5MeOCA)(H<sub>2</sub>O)NO<sub>3</sub>] 3.. (Second trial)

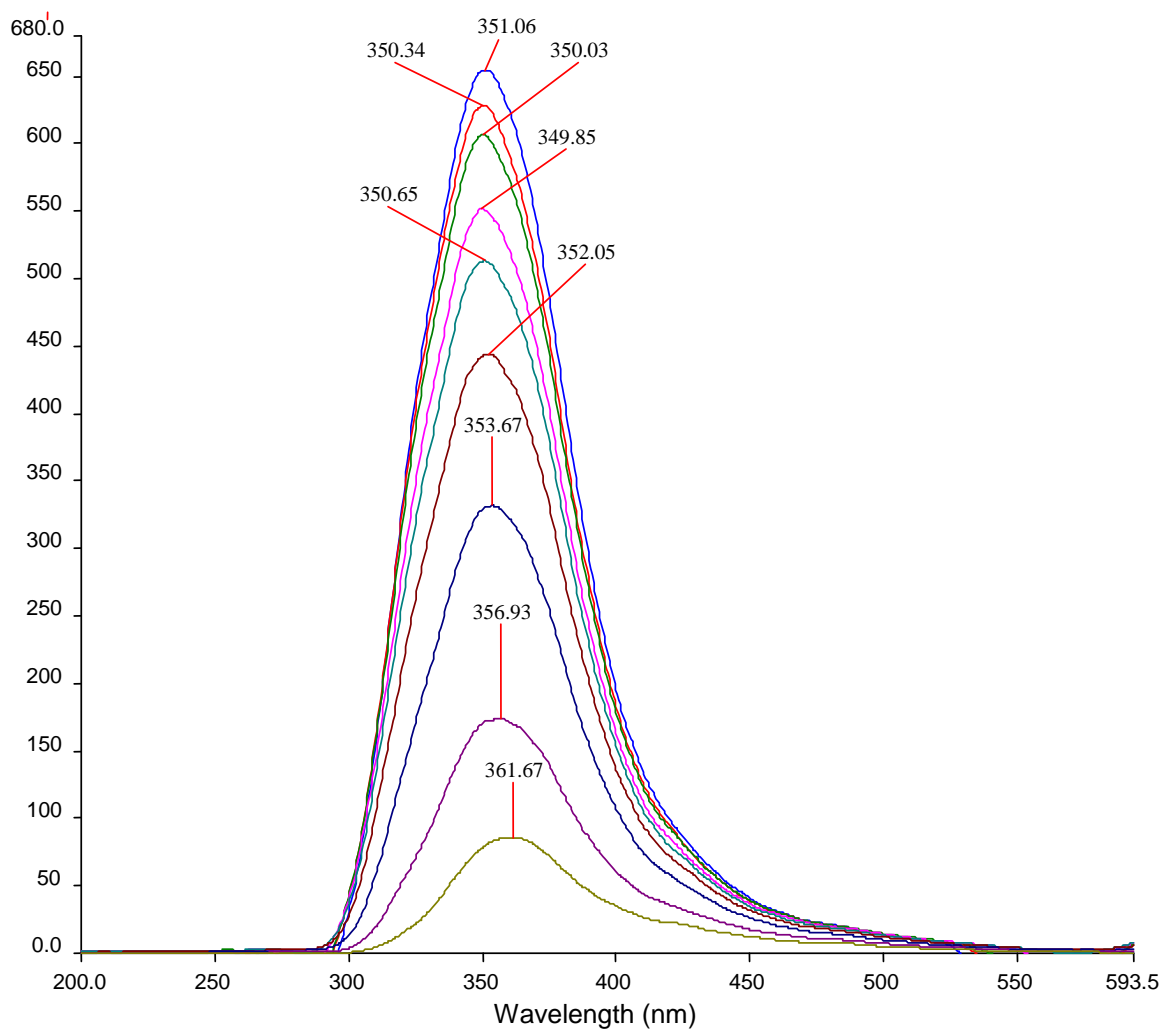

Figure S4.3(III) Fluorescence quenching of 0.24 mM BSA by increasing concentration [0 (a), 2 (b), 4 (c), 10 (d), 20 (e), 40 (f), 100 (g), 200 (h) and 400 (i)  $\mu$ M] of L-[Cu(phen)(5MeOCA)(H<sub>2</sub>O)NO<sub>3</sub>] 3. (Third trial)

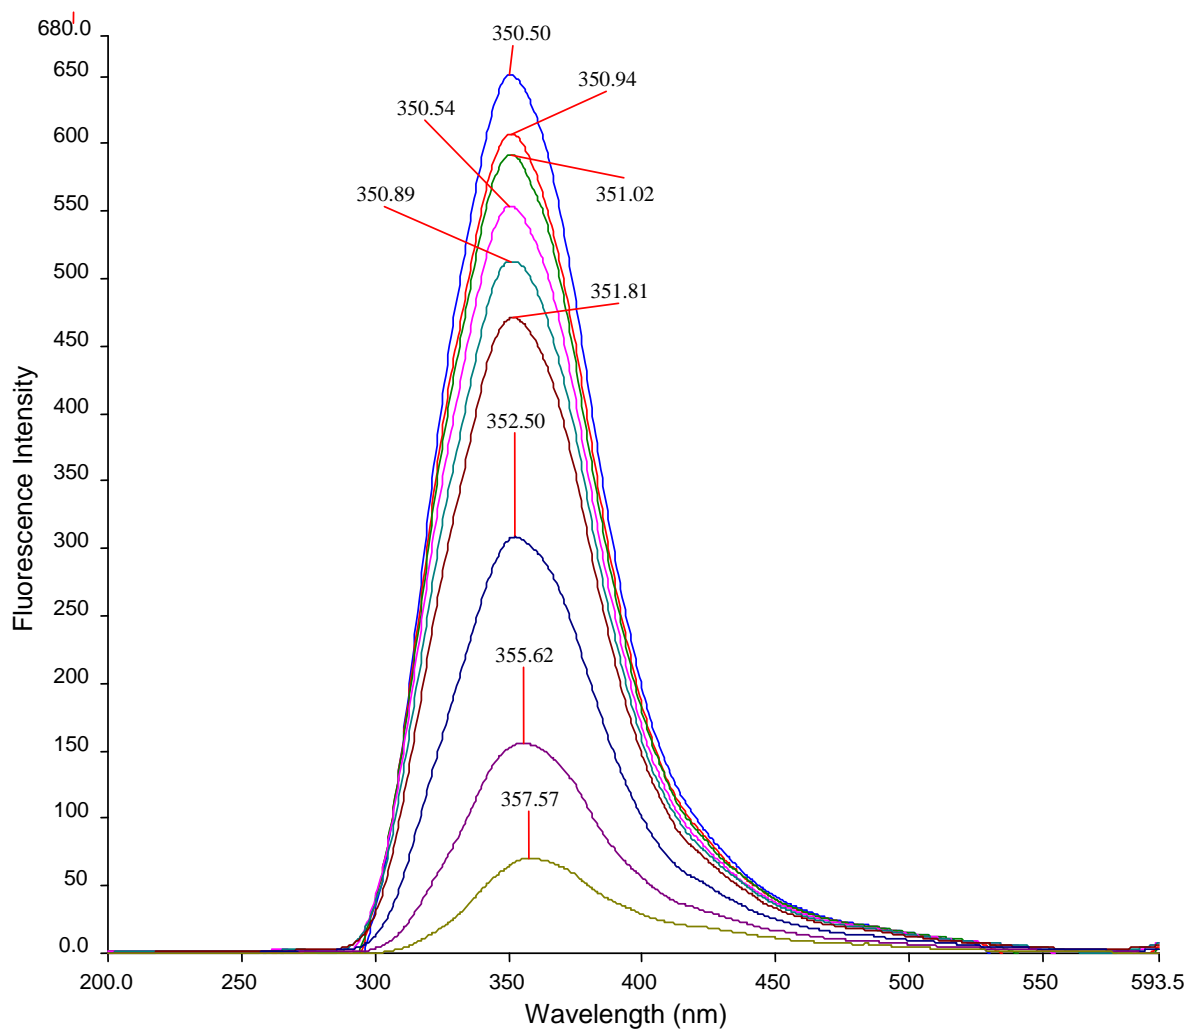

Figure S4.2(I) Fluorescence quenching of 0.24 mM BSA by increasing concentration [0 (a), 2 (b), 4 (c), 10 (d), 20 (e), 40 (f), 100 (g), 200 (h) and 400 (i)  $\mu$ M] of [Cu(phen)(D-threo)(H<sub>2</sub>O)NO<sub>3</sub> 2. (First trial)



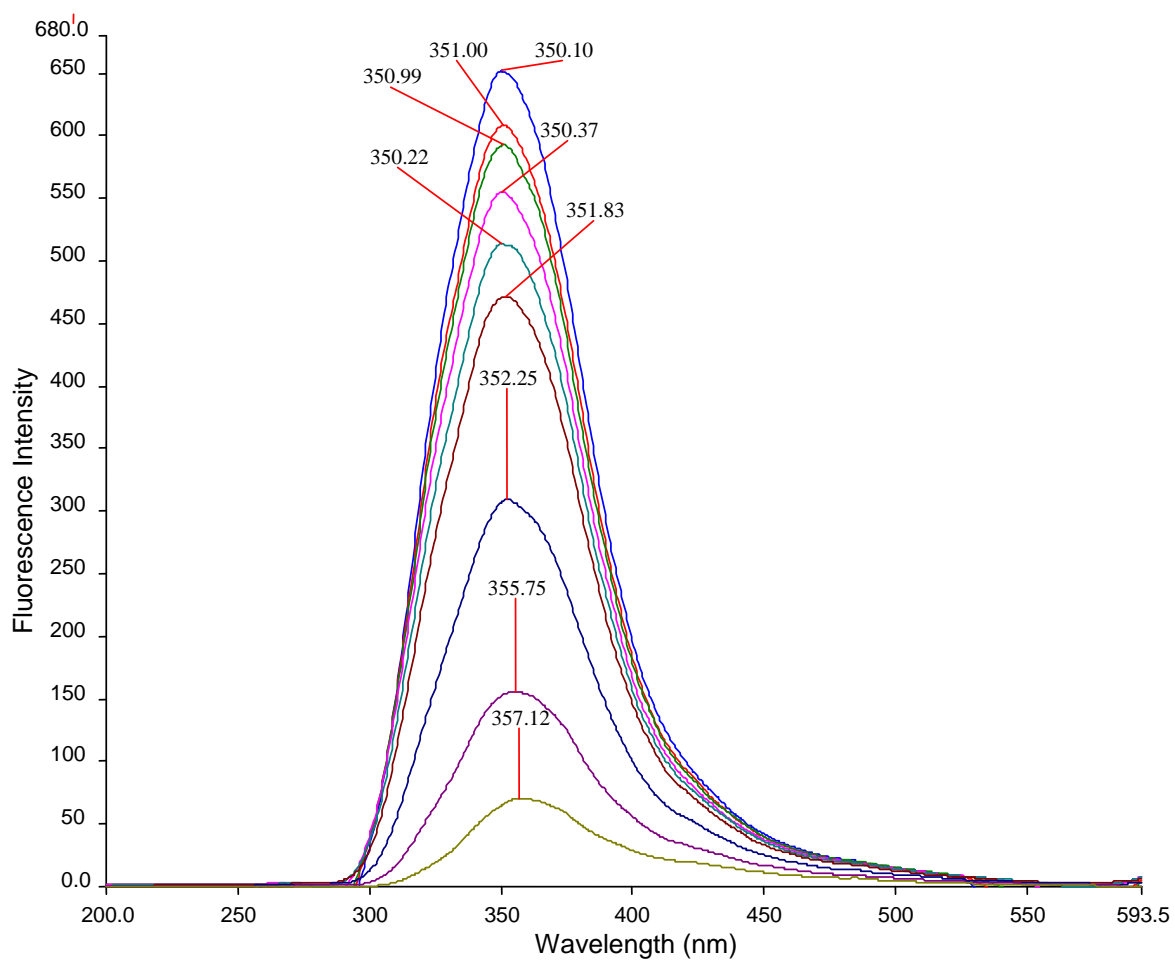

Figure S4.2(II) Fluorescence quenching of 0.24 mM BSA by increasing concentration [0 (a), 2 (b), 4 (c), 10 (d), 20 (e), 40 (f), 100 (g), 200 (h) and 400 (i)  $\mu$ M] of [Cu(phen)(D-threo)(H<sub>2</sub>O)NO<sub>3</sub>]**2**. (Second trial)

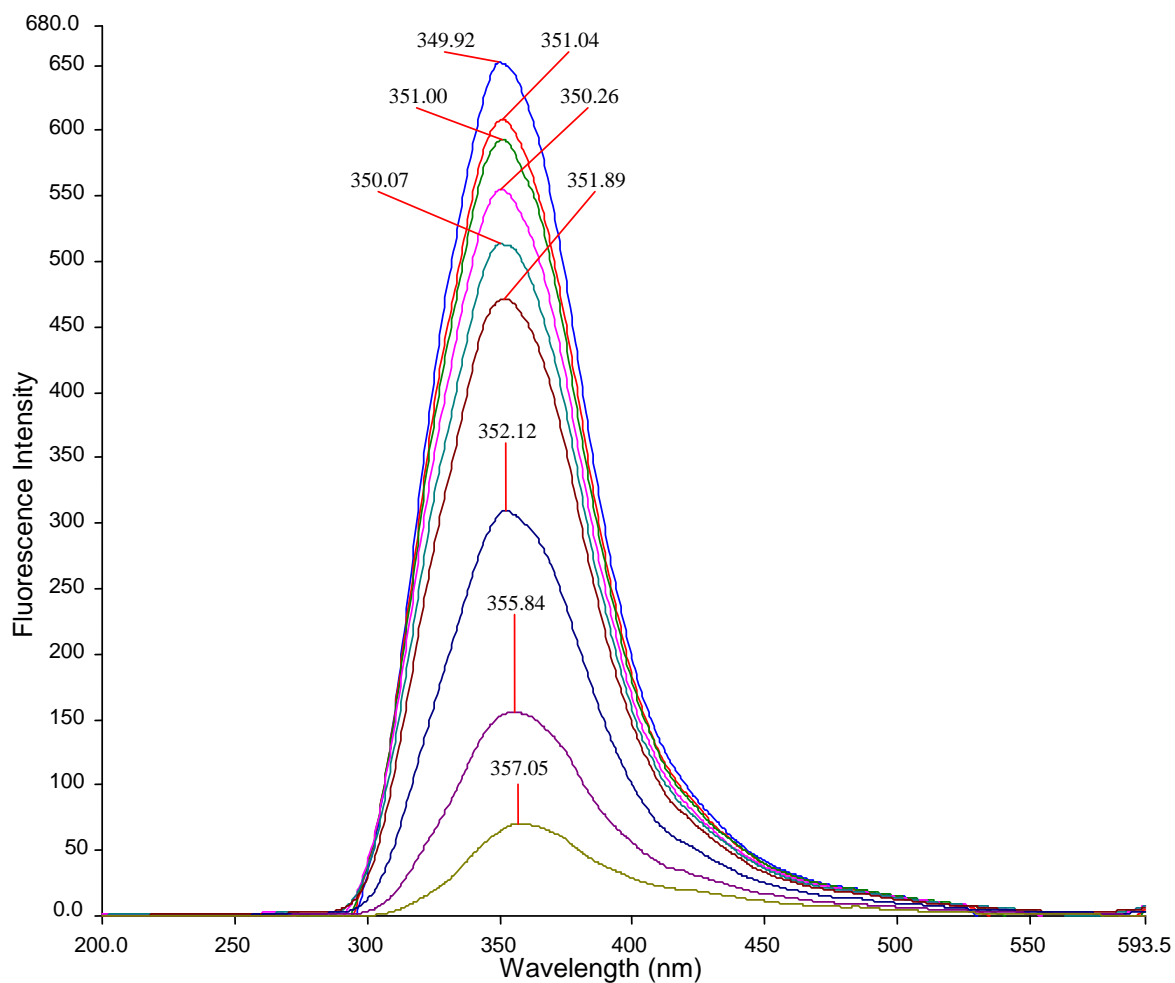

Figure S4.2(III) Fluorescence quenching of 0.24 mM BSA by increasing concentration [0 (a), 2 (b), 4 (c), 10 (d), 20 (e), 40 (f), 100 (g), 200 (h) and 400 (i)  $\mu\text{M}$ ] of  $[\text{Cu}(\text{phen})(\text{D-threo})(\text{H}_2\text{O})\text{NO}_3]_2$ . (Third trial)

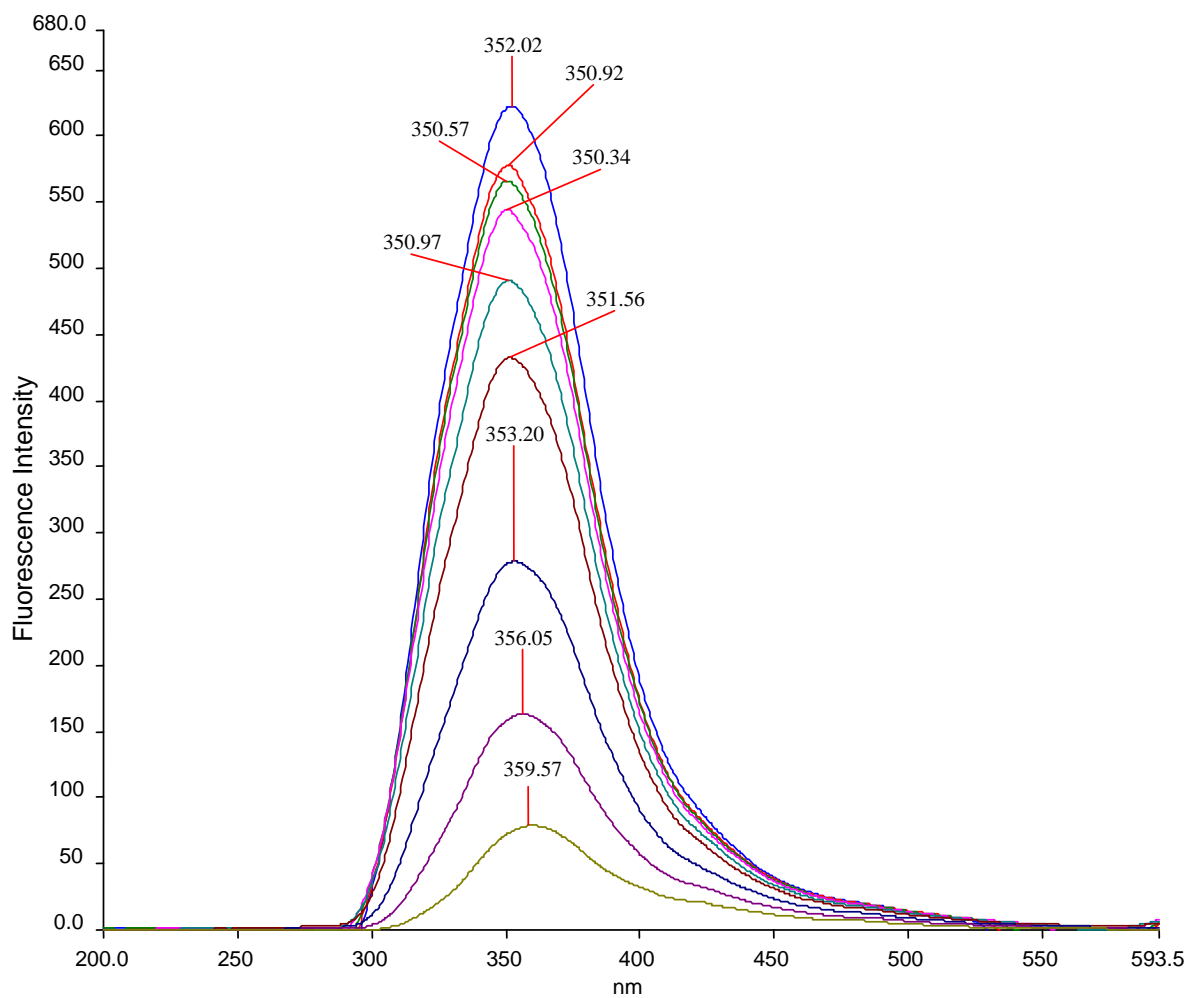

Figure S4.1(I) Fluorescence quenching of 0.24 mM BSA by increasing concentration [0 (a), 2 (b), 4 (c), 10 (d), 20 (e), 40 (f), 100 (g), 200 (h) and 400 (i) μM] of [Cu(phen)(L-threo)(H<sub>2</sub>O)NO<sub>3</sub> 1. (First trial)

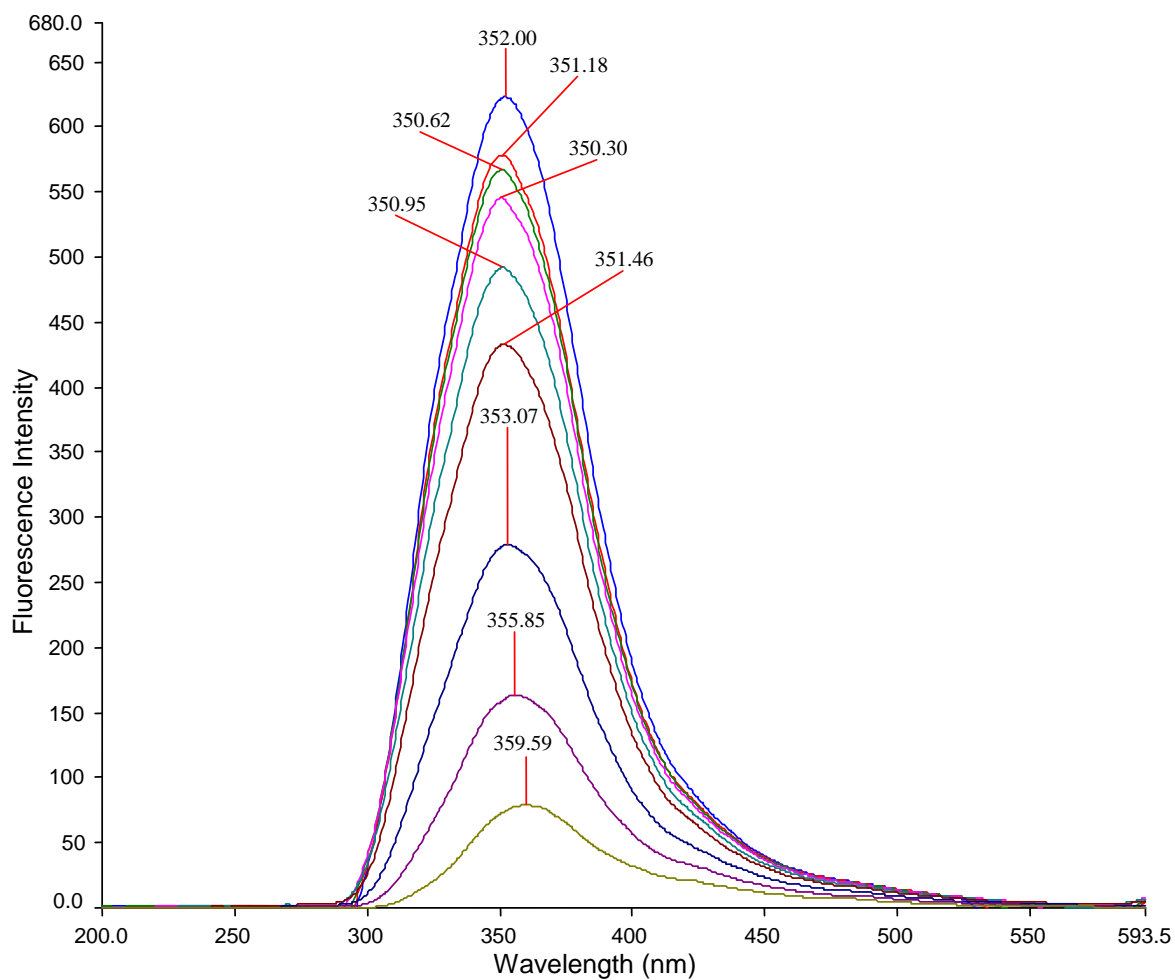

Figure S4.1(II) Fluorescence quenching of 0.24 mM BSA by increasing concentration [0 (a), 2 (b), 4 (c), 10 (d), 20 (e), 40 (f), 100 (g), 200 (h) and 400 (i) μM] of [Cu(phen)(L-threo)(H<sub>2</sub>O)NO<sub>3</sub>] 1. (Second trial)

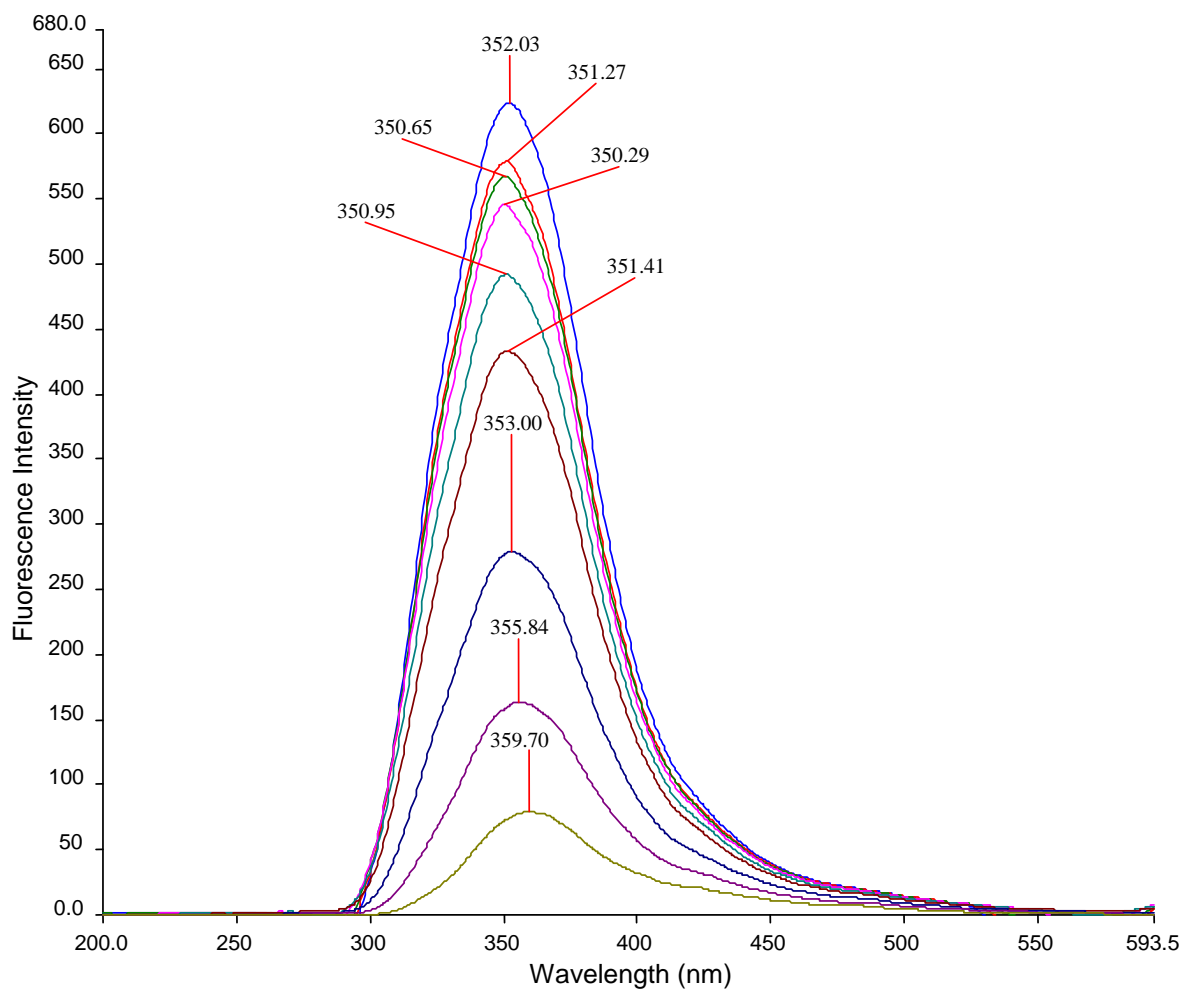

Figure S4.1(III) Fluorescence quenching of 0.24 mM BSA by increasing concentration [0 (a), 2 (b), 4 (c), 10 (d), 20 (e), 40 (f), 100 (g), 200 (h) and 400 (i)  $\mu$ M] of [Cu(phen)(L-threo)(H<sub>2</sub>O)NO<sub>3</sub>] 1. (Third trial)
